# Supplementary material for: Blue emissive amidinate-based tetra-coordinated boron compounds
Source: Royal Society of Chemistry journal article supplement (doi:10.1039/d3dt03378c), 2023-01-01
Supplement: d3dt03378c1.pdf [file d3dt03378c1.pdf]

## Supporting Information

### Blue Emissive Amidinate Based Tetra coordinate Boron Compounds:

Ramkumar Kannan,<sup>[a]</sup> Prakash Nayak,<sup>[b]</sup> Ramar Arumugam,<sup>[a]</sup> D. Krishna Rao,<sup>[a]</sup> Kaustubh R. Mote,<sup>[a]</sup> Anna Chandrasekar Murali,<sup>[b]</sup> Krishnan Venkatasubbaiah,<sup>\*[b]</sup> and Vadapalli Chandrasekhar<sup>\*[a][c]</sup>

<sup>[a]</sup> Tata Institute of Fundamental Research, Hyderabad, 500046, India.

<sup>[b]</sup> Department of Chemical Sciences, National Institute of Science, Education and Research, Bhubaneswar, Orissa-752050, India.

<sup>[c]</sup> Department of Chemistry, Indian Institute of Technology Kanpur, Kanpur-208 016, Uttar Pradesh, India.

### Contents

1. General Synthetic Procedures and Characterization
2. Variable temperature NMR and <sup>1</sup>H-<sup>19</sup>F HOESY results
3. Crystallographic data
4. Electrochemical properties
5. Computational Details

## 1. General synthetic procedure and Characterization:

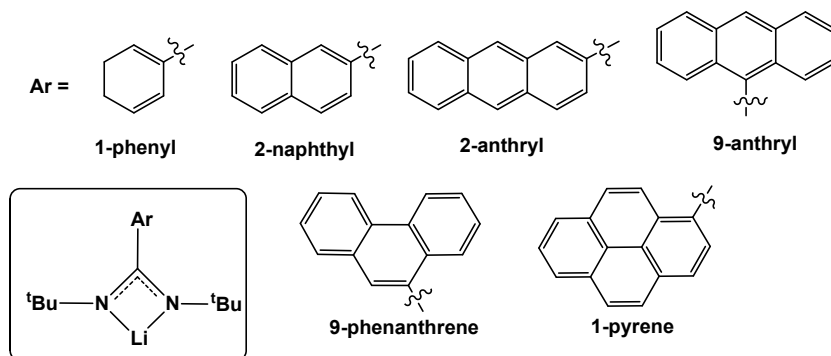

**Ar lithium salts (1-6Li) synthesis (Ar = 1-phenyl, 2-naphthyl, 2-anthryl, 9-anthryl, 9-phenanthrene and 1-pyrene):** A diethyl ether solution of bromo aryl (7.77 mmol) was taken in a 100ml Schleck flask and drop wise addition of n-BuLi (2.5 M in hexane, 7.77 mmol) was done at  $-78^{\circ}\text{C}$ . After 4hr stirring the diethyl ether solution of carbodiimide (7.77 mmol) was added drop wise and stirred for additional 16 hr at room temperature. Diethyl ether was removed and after pentane wash ( $2 \times 40$  mL) powdery lithium salts were formed. The products used as such for further reactions. Yield: (57-93.9%).

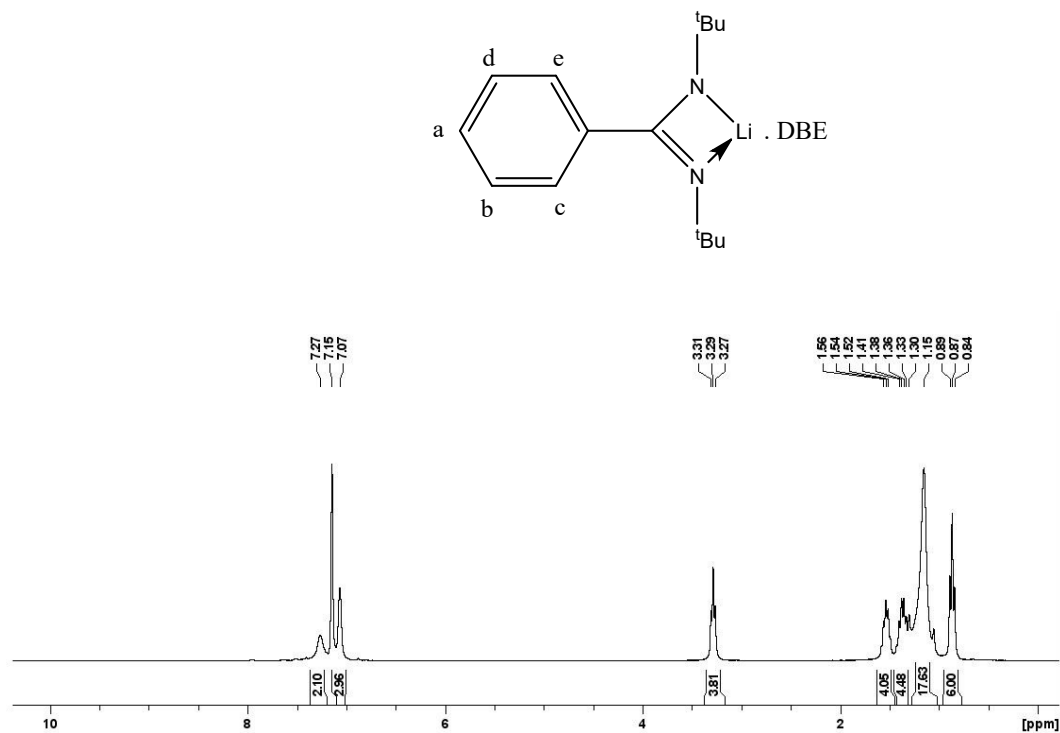

**Figure S1:**  $^1\text{H}$  NMR spectrum ( $\text{C}_6\text{D}_6$ , 300 MHz) of compound **1Li**

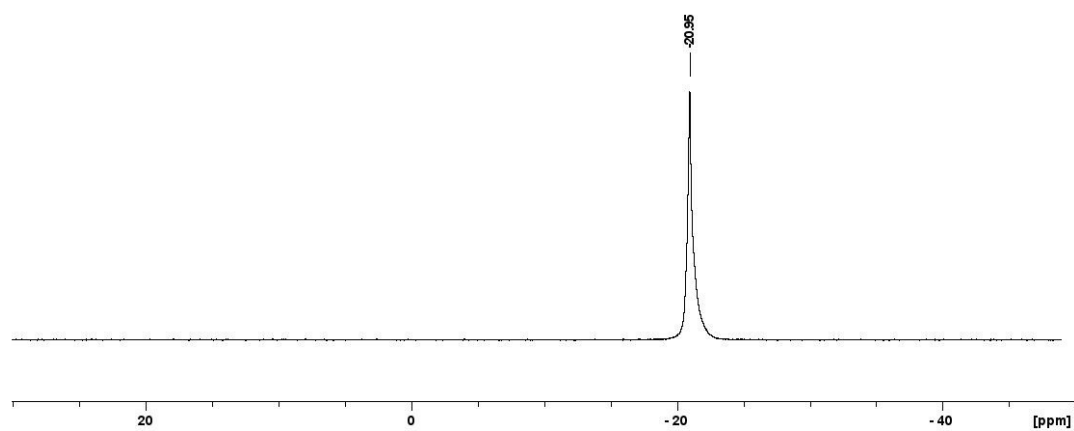

**Figure S2:**  ${}^7\text{Li}$  NMR spectrum ( $[\text{C}_6\text{D}_6]$ , 116.6 MHz) of compound **1Li**

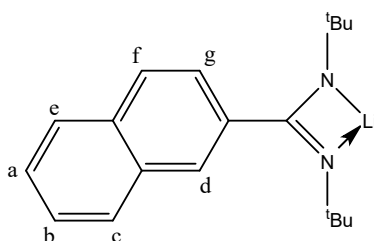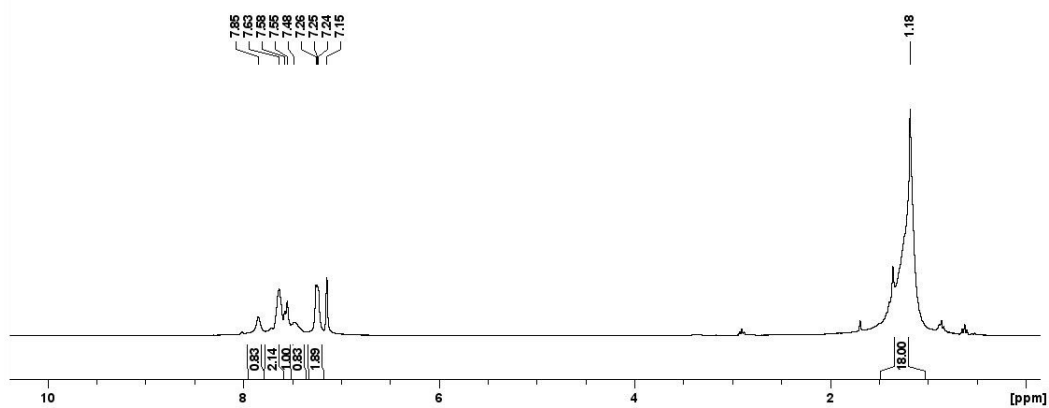

**Figure S3:**  ${}^1\text{H}$  NMR spectrum ( $[\text{C}_6\text{D}_6]$ , 300 MHz) of compound **2Li**

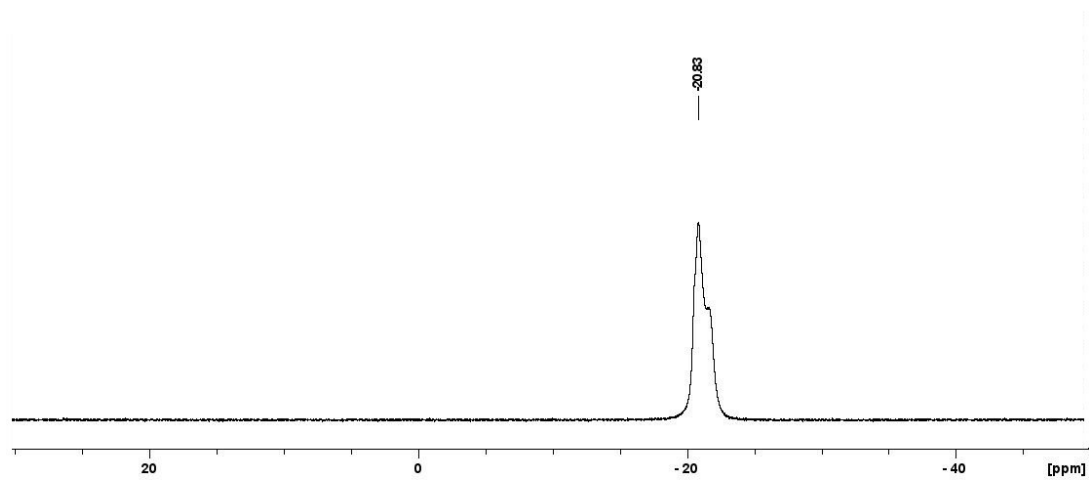

Figure S4:  ${}^7\text{Li}$  NMR spectrum ( $[\text{C}_6\text{D}_6]$ , 116.6 MHz) of compound **2Li**

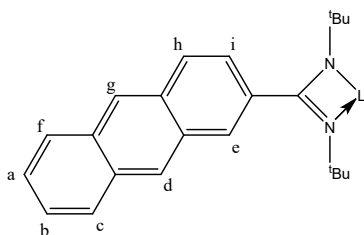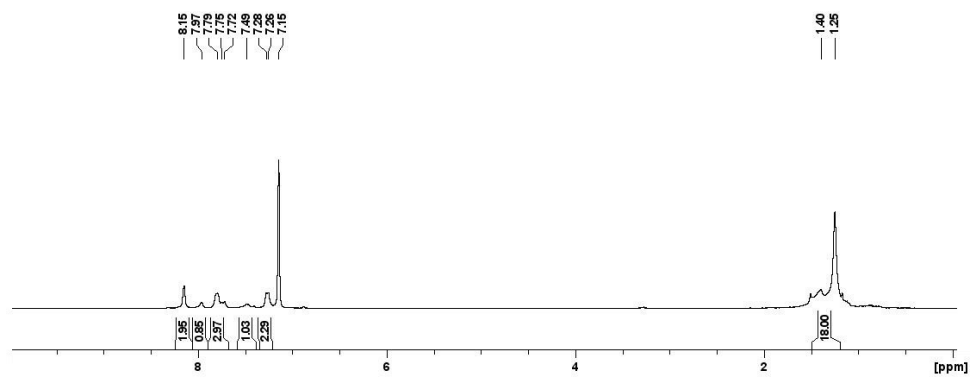

Figure S5:  ${}^1\text{H}$  NMR spectrum ( $[\text{C}_6\text{D}_6]$ , 300 MHz) of compound **3Li**

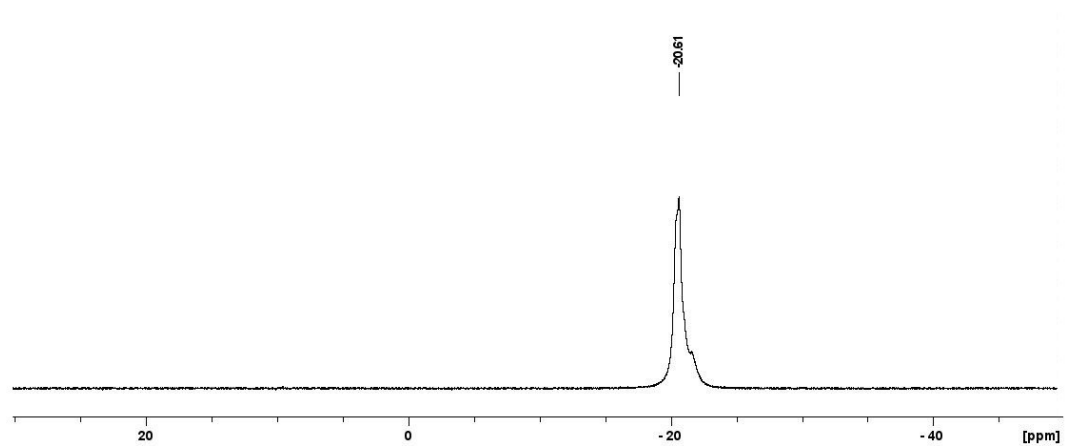

**Figure S6:**  $^7\text{Li}$  NMR spectrum ( $[\text{C}_6\text{D}_6]$ , 116.6 MHz) of compound **3Li**

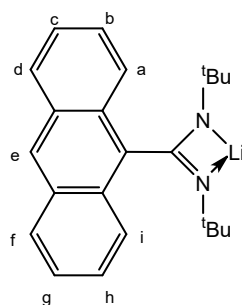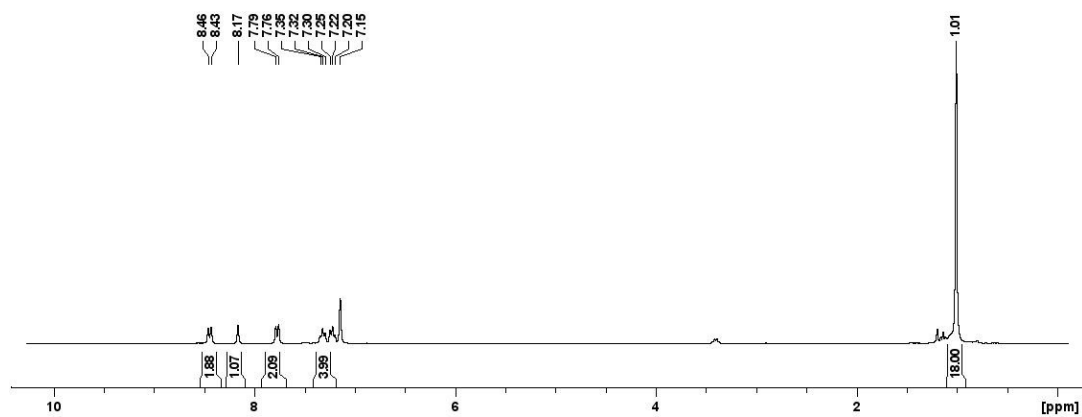

**Figure S7:**  $^1\text{H}$  NMR spectrum ( $[\text{C}_6\text{D}_6]$ , 300 MHz) of compound **4Li**

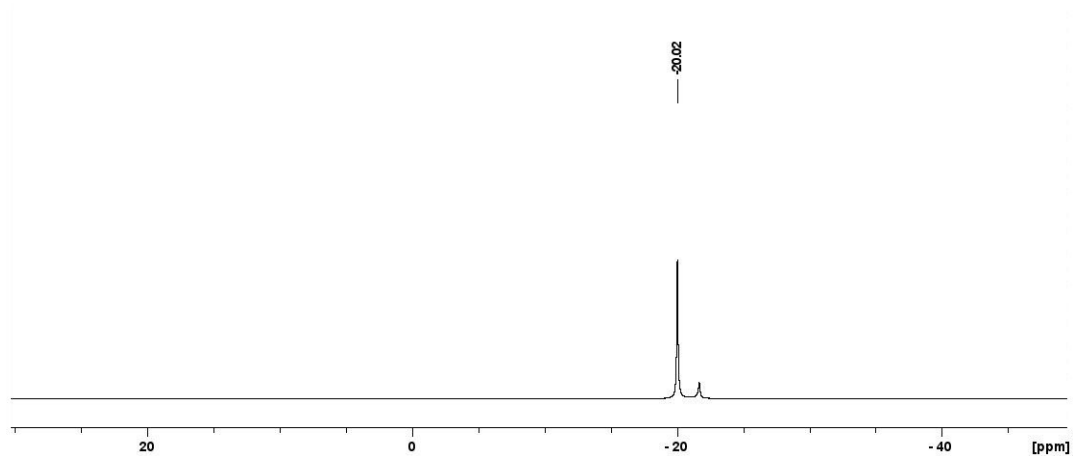

**Figure S8:**  $^7\text{Li}$  NMR spectrum ( $[\text{C}_6\text{D}_6]$ , 116.6 MHz) of compound **4Li**

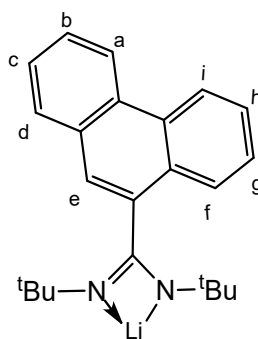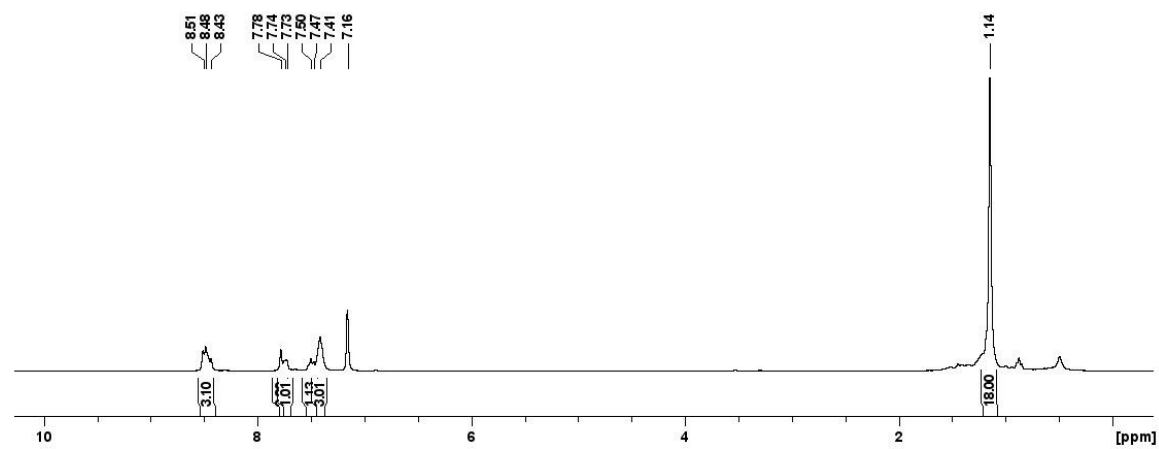

**Figure S9:**  $^1\text{H}$  NMR spectrum ( $[\text{C}_6\text{D}_6]$ , 300 MHz) of compound **5Li**

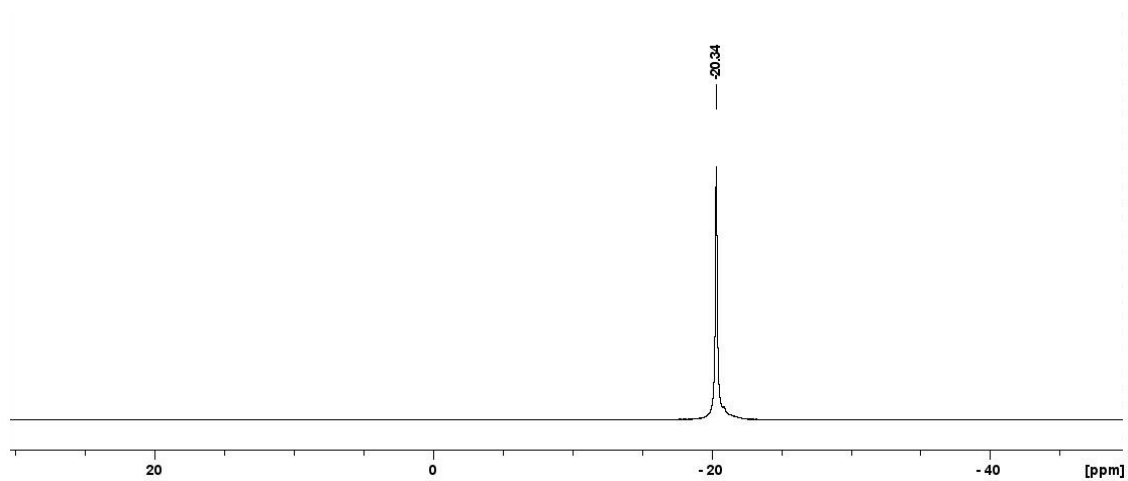

**Figure S10:** <sup>7</sup>Li NMR spectrum (C<sub>6</sub>D<sub>6</sub>, 116.6 MHz) of compound **5Li**

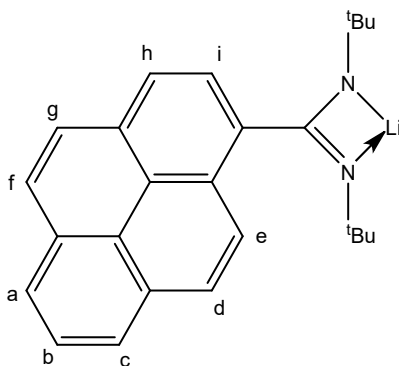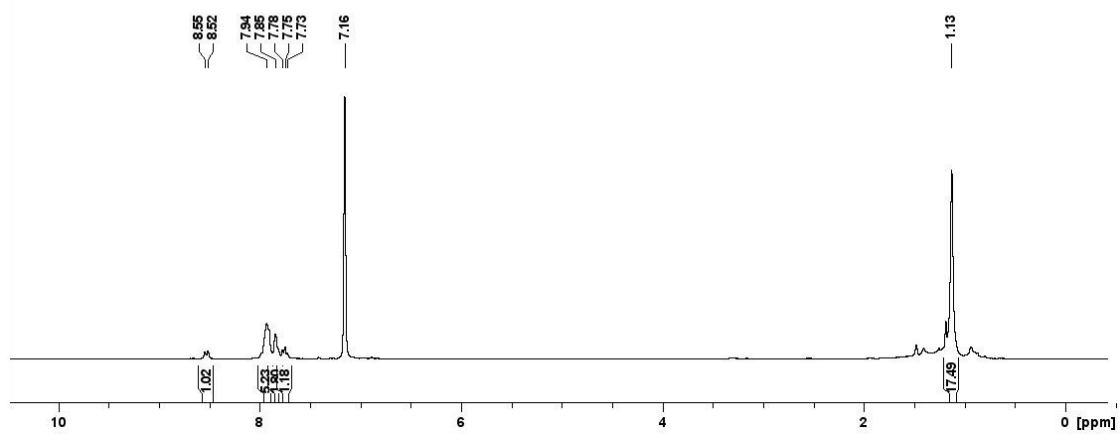

**Figure S11:** <sup>1</sup>H NMR spectrum (C<sub>6</sub>D<sub>6</sub>, 300 MHz) of compound **6Li**

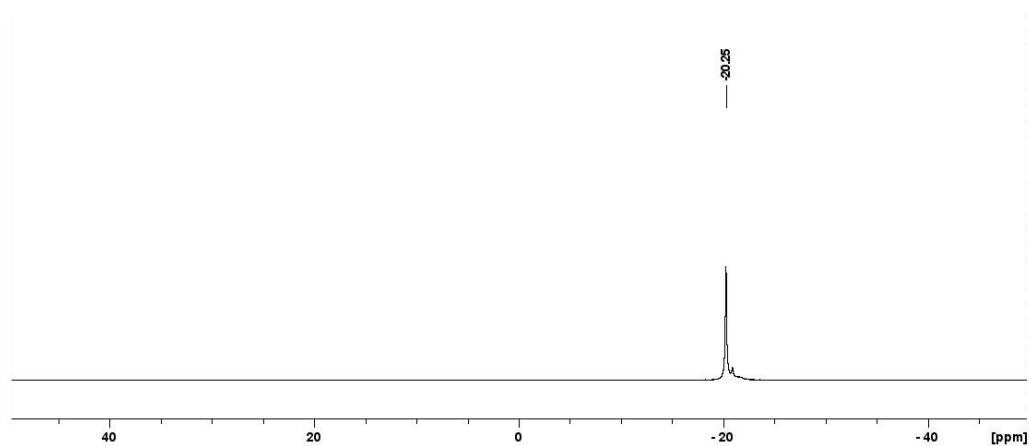

Figure S12:  $^7\text{Li}$  NMR spectrum ( $\text{C}_6\text{D}_6$ , 116.6 MHz) of compound **6Li**

Compound **4-Li.2THF**:

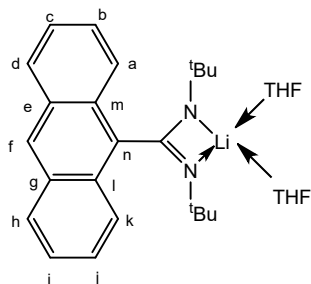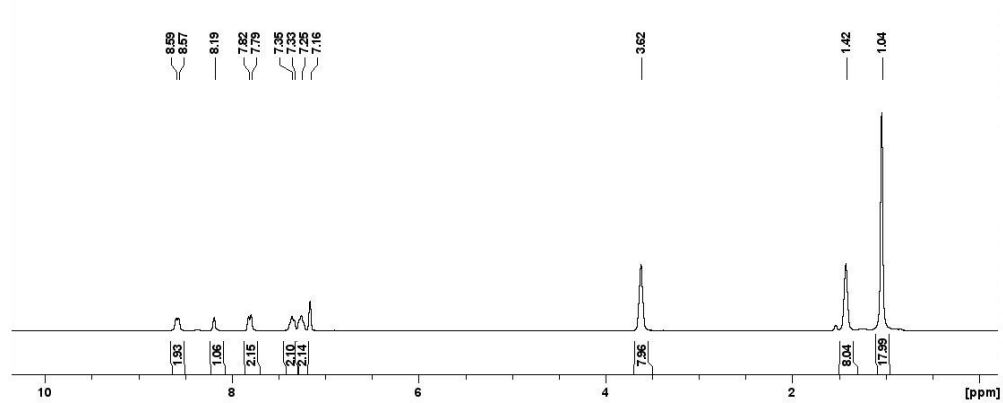

Figure S13:  $^1\text{H}$  NMR spectrum ( $\text{C}_6\text{D}_6$ , 300 MHz) of compound **4-Li.2THF**



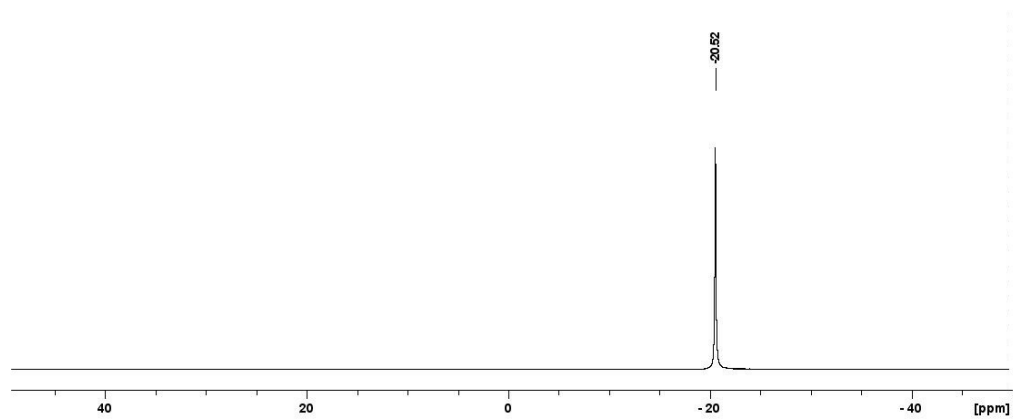

Figure S14:  $^7\text{Li}$  NMR spectrum ( $[\text{C}_6\text{D}_6]$ , 116.6 MHz) of compound 4-Li.2THF

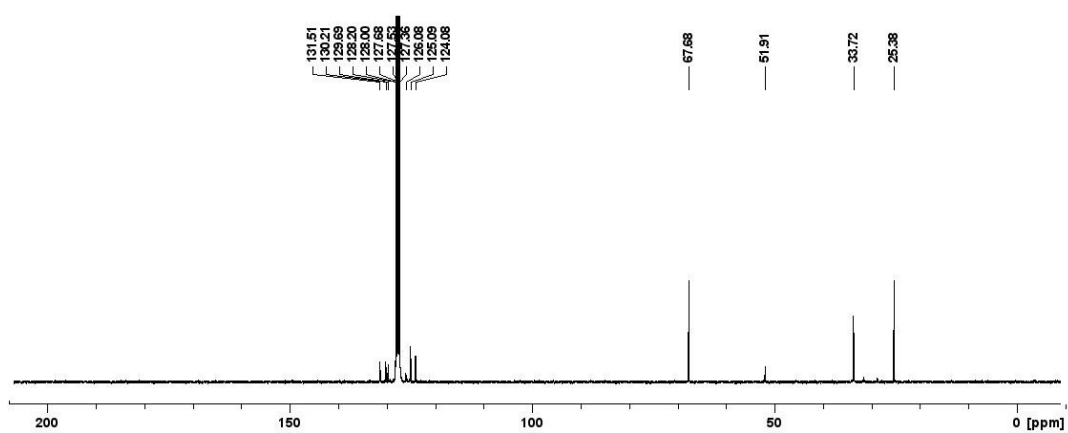

Figure S15:  $^{13}\text{C}$  NMR spectrum ( $[\text{CDCl}_3]$ , 75 MHz) of compound 4-Li.2THF.

Compound 1BF<sub>2</sub>:

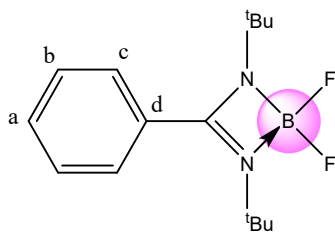

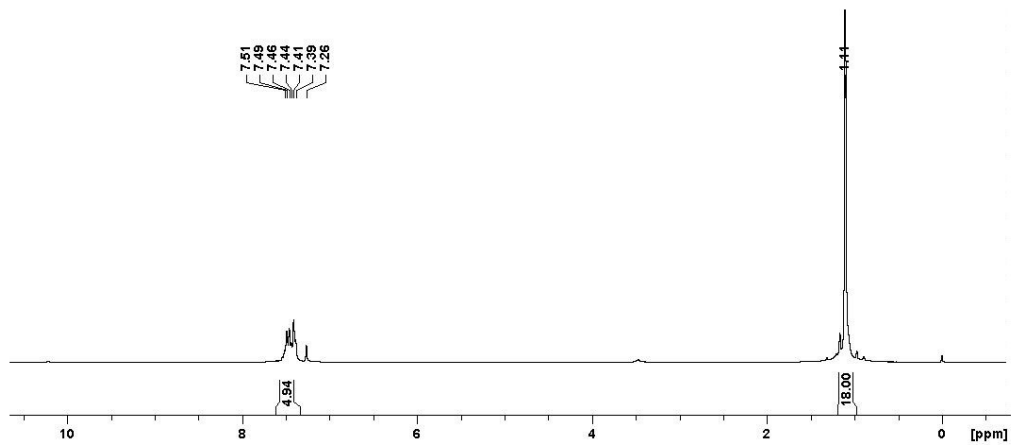

Figure S16:  $^1\text{H}$  NMR spectrum ( $[\text{CDCl}_3, 300 \text{ MHz}]$ ) of compound  $1\text{BF}_2$ .

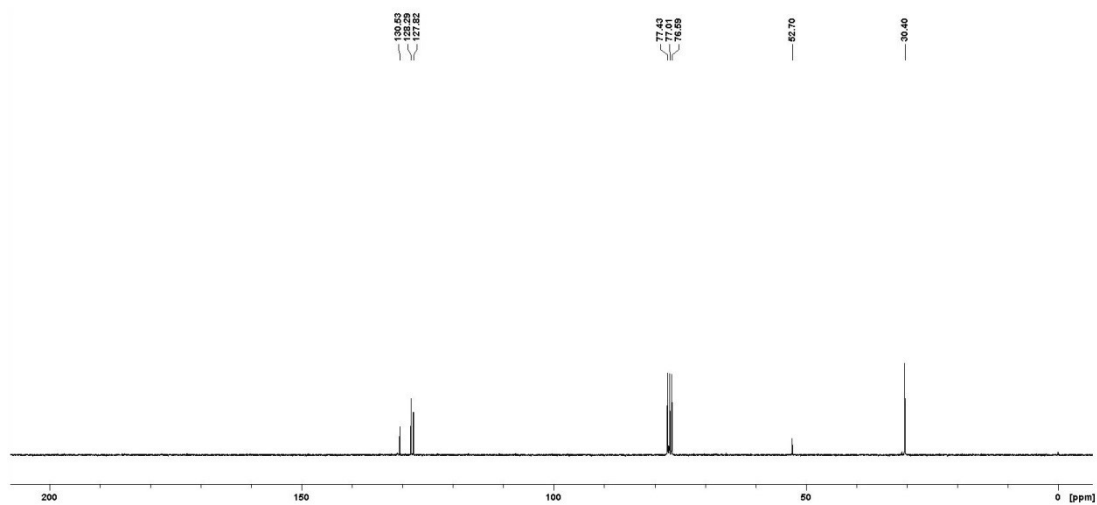

Figure S17:  $^{13}\text{C}$  NMR spectrum ( $[\text{CDCl}_3, 75 \text{ MHz}]$ ) of compound  $1\text{BF}_2$ .

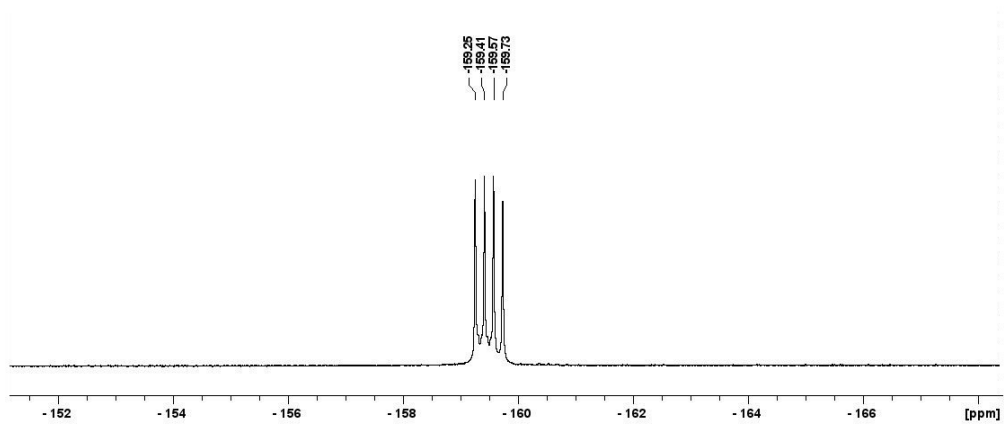



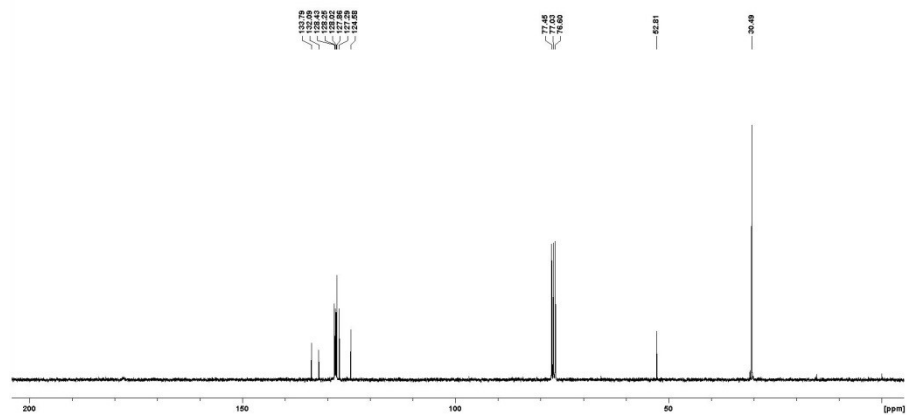

Figure S21: <sup>13</sup>C NMR spectrum ([CDCl<sub>3</sub>], 75 MHz) of compound 2BF<sub>2</sub>.

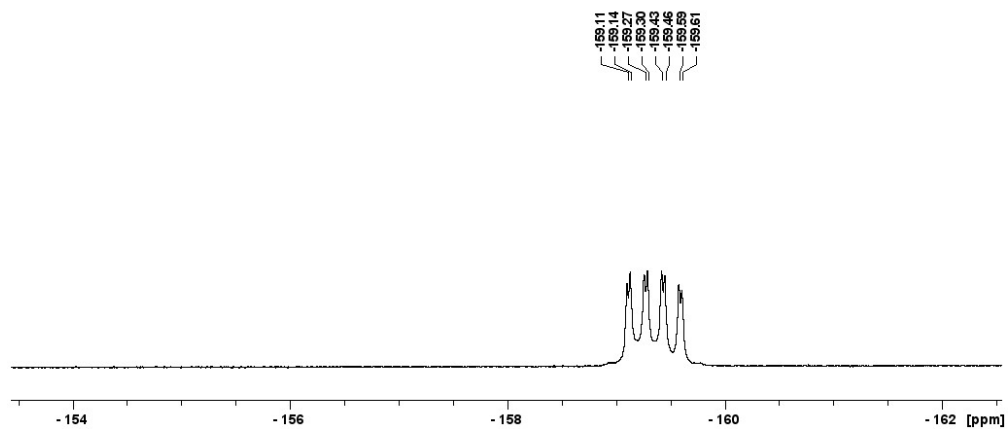

Figure S22: <sup>19</sup>F NMR spectrum ([CDCl<sub>3</sub>], 282 MHz) of compound 2BF<sub>2</sub>.

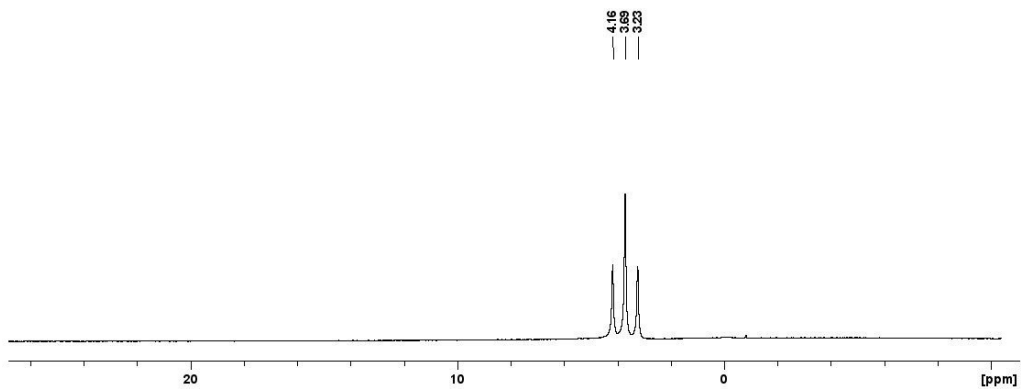

Figure S23:  $^{11}\text{B}$  NMR spectrum ( $[\text{CDCl}_3]$ , 96 MHz) of compound **2BF<sub>2</sub>**.

Compound **3BF<sub>2</sub>**:

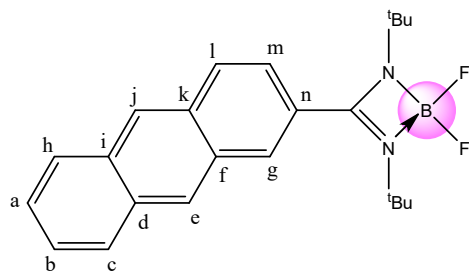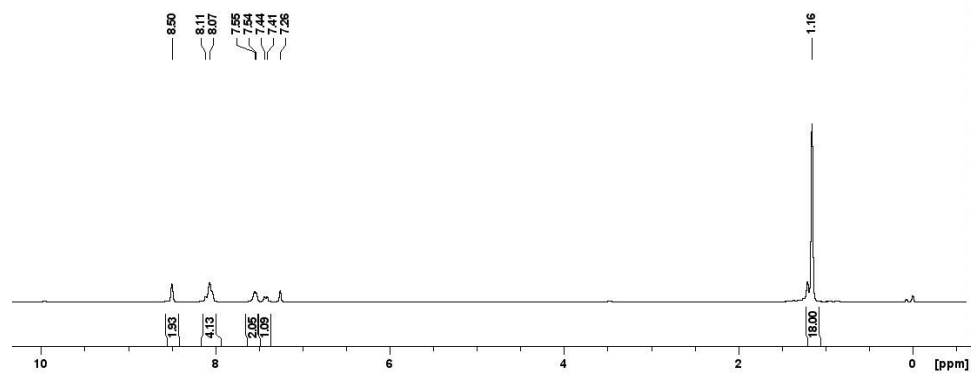

Figure S24:  $^1\text{H}$  NMR spectrum ( $[\text{CDCl}_3]$ , 300 MHz) of compound **3BF<sub>2</sub>**.

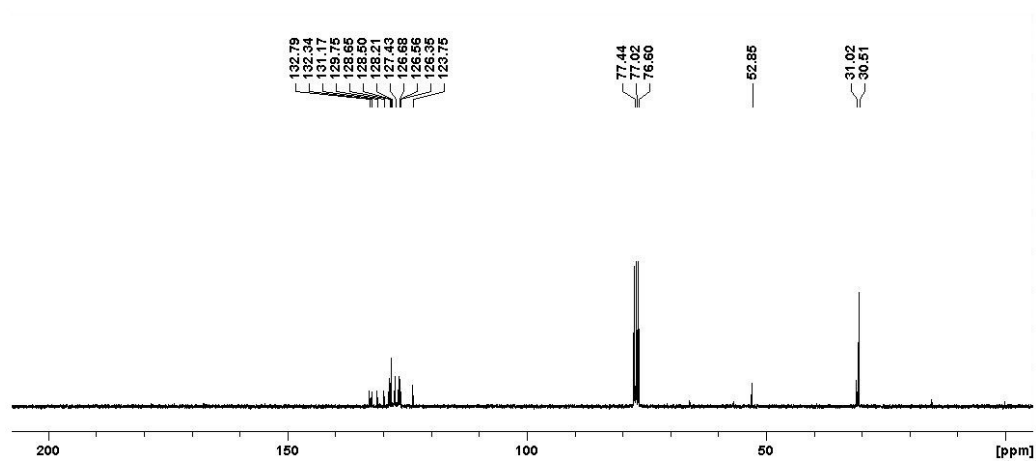

Figure S25:  $^{13}\text{C}$  NMR spectrum ( $[\text{CDCl}_3]$ , 75 MHz) of compound **3BF<sub>2</sub>**.

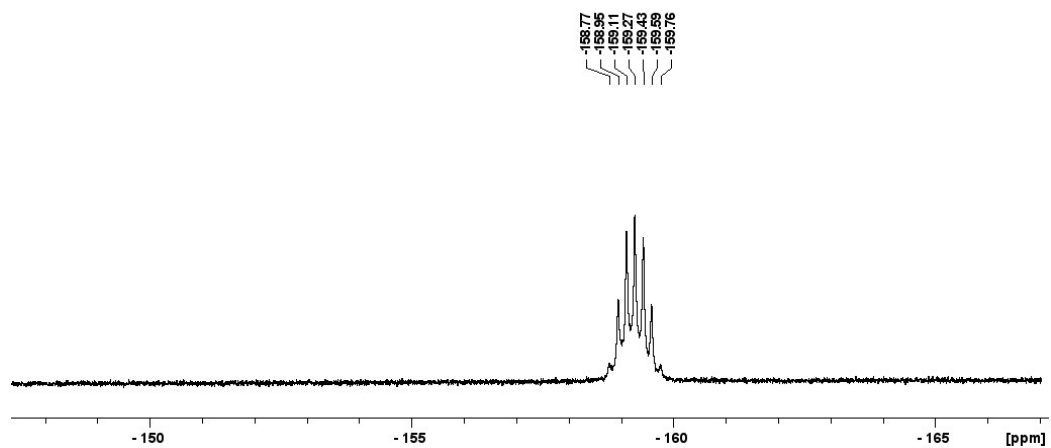

Figure S26:  $^{19}\text{F}$  NMR spectrum ( $[\text{CDCl}_3]$ , 282 MHz) of compound  $3\text{BF}_2$ .

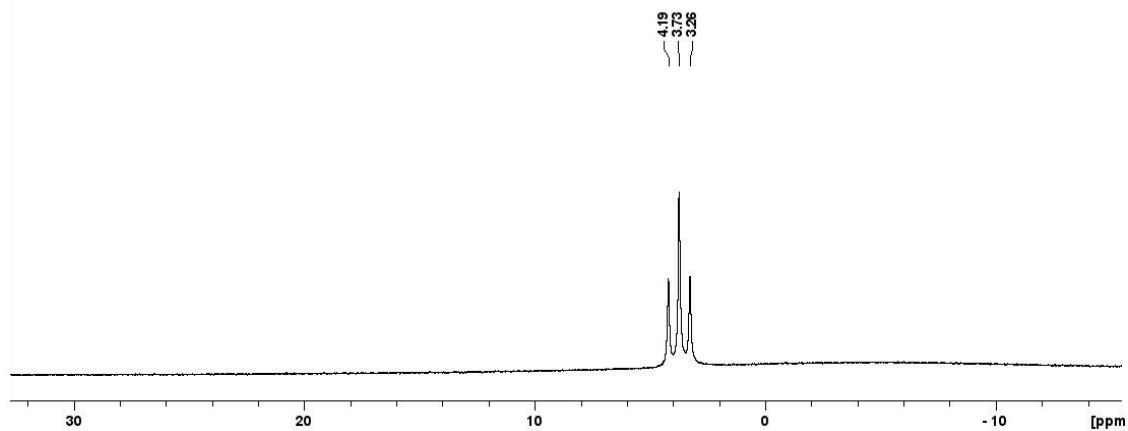

Figure S27:  $^{11}\text{B}$  NMR spectrum ( $[\text{CDCl}_3]$ , 96 MHz) of compound  $3\text{BF}_2$ .

Compound  $4\text{BF}_2$ :

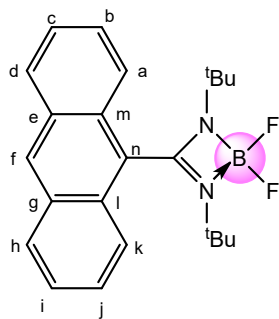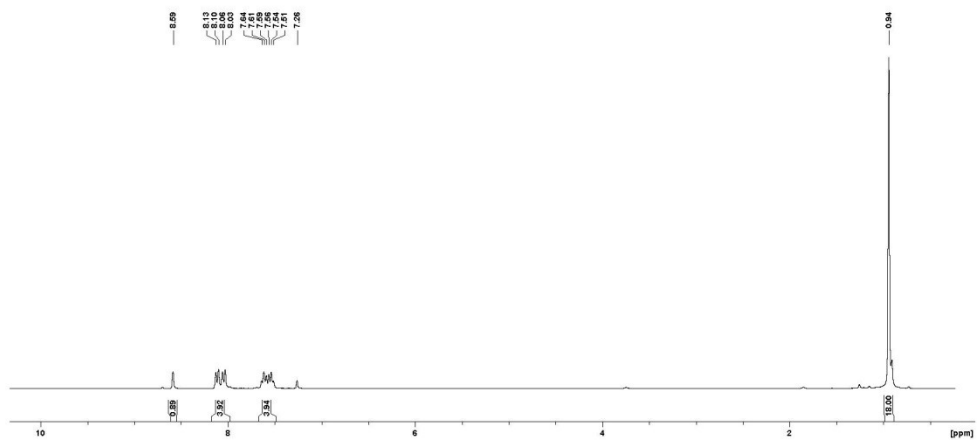

Figure S28: <sup>1</sup>H NMR spectrum ([CDCl<sub>3</sub>, 300 MHz) of compound **4BF<sub>2</sub>**.

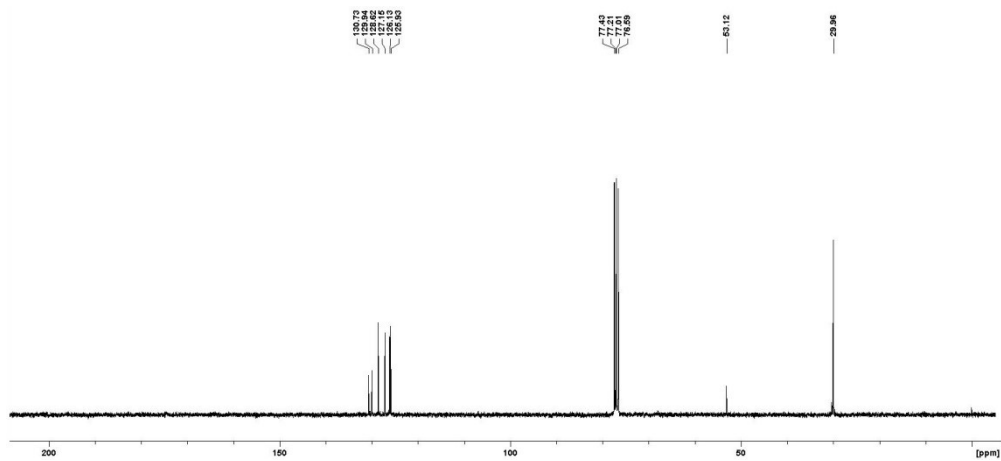

Figure S29: <sup>13</sup>C NMR spectrum ([CDCl<sub>3</sub>, 75 MHz) of compound **4BF<sub>2</sub>**.

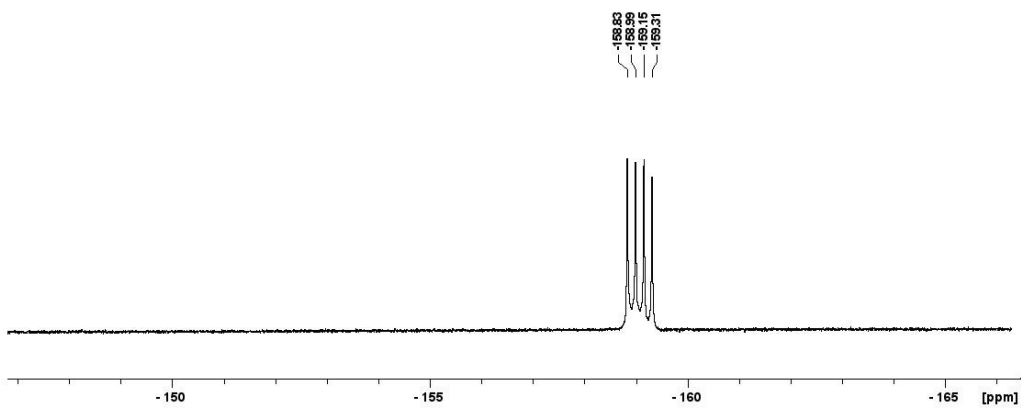

Figure S30:  $^{19}\text{F}$  NMR spectrum ( $[\text{CDCl}_3]$ , 282 MHz) of compound  $4\text{BF}_2$ .

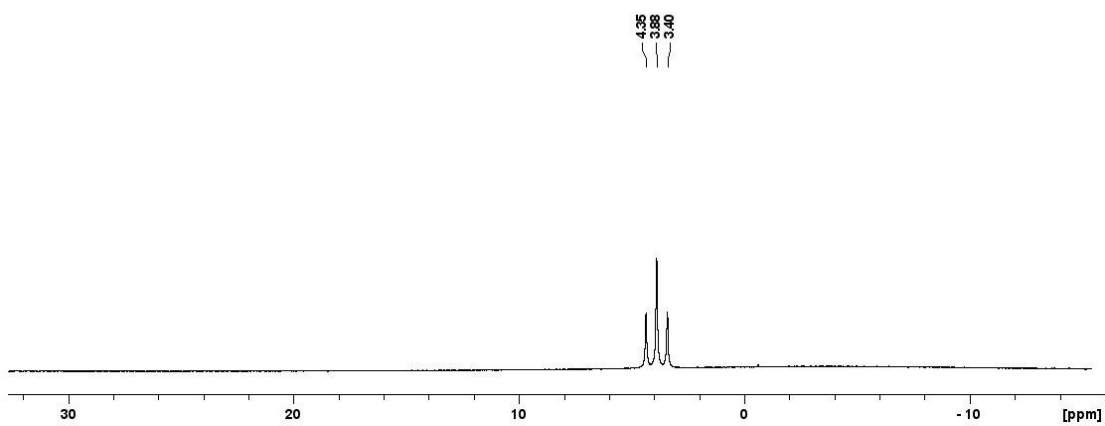

Figure S31:  $^{11}\text{B}$  NMR spectrum ( $[\text{CDCl}_3]$ , 96 MHz) of compound  $4\text{BF}_2$ .

Compound  $5\text{BF}_2$ :

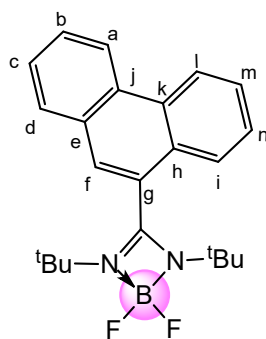



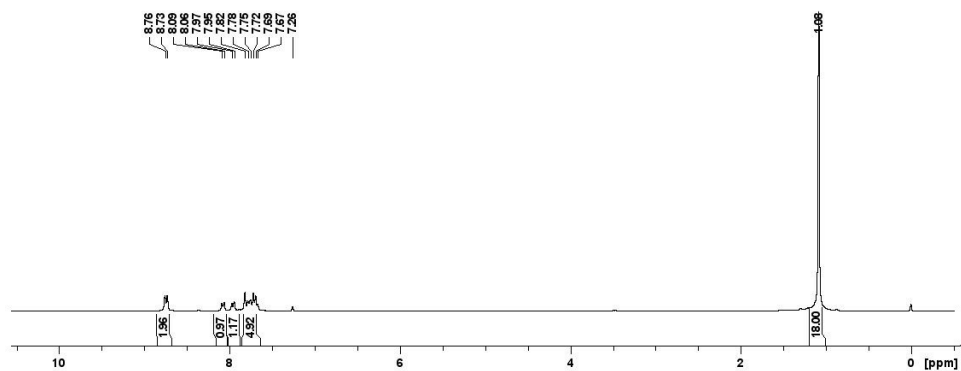

Figure S32:  $^1\text{H}$  NMR spectrum ( $[\text{CDCl}_3]$ , 300 MHz) of compound  $5\text{BF}_2$ .

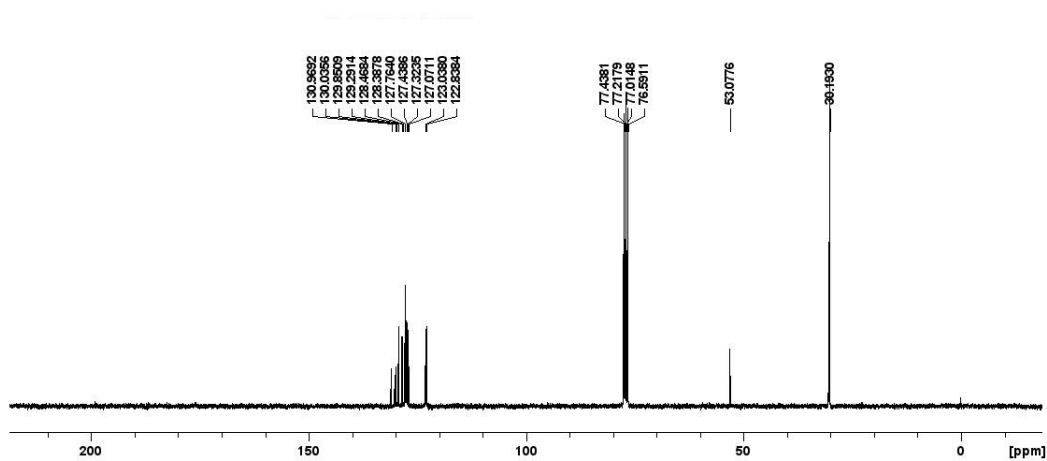

Figure S33:  $^{13}\text{C}$  NMR spectrum ( $[\text{CDCl}_3]$ , 75 MHz) of compound  $5\text{BF}_2$ .

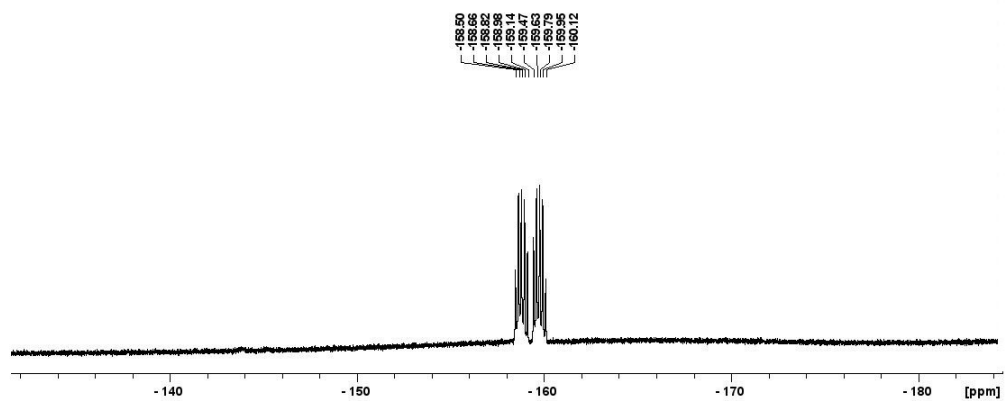

Figure S34:  $^{19}\text{F}$  NMR spectrum ( $[\text{CDCl}_3]$ , 282 MHz) of compound  $5\text{BF}_2$ .

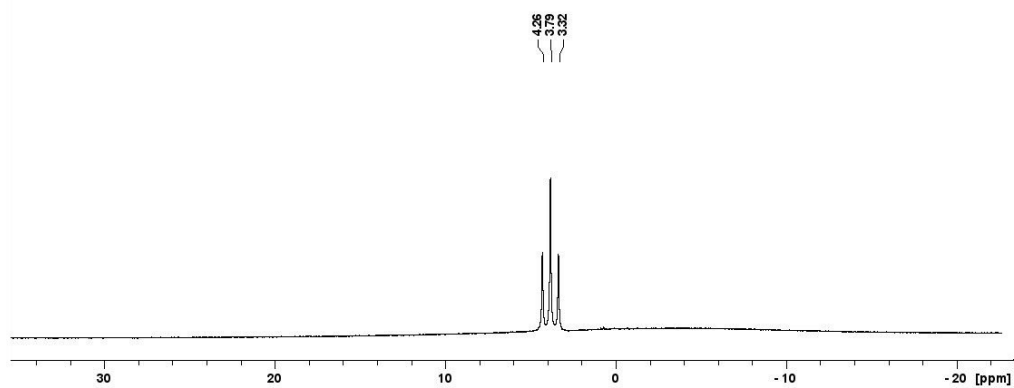

Figure S35:  $^{11}\text{B}$  NMR spectrum ( $[\text{CDCl}_3]$ , 96 MHz) of compound **5BF<sub>2</sub>**.

Compound **6BF<sub>2</sub>**:

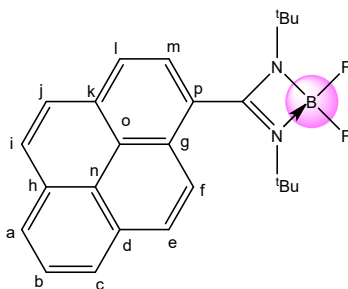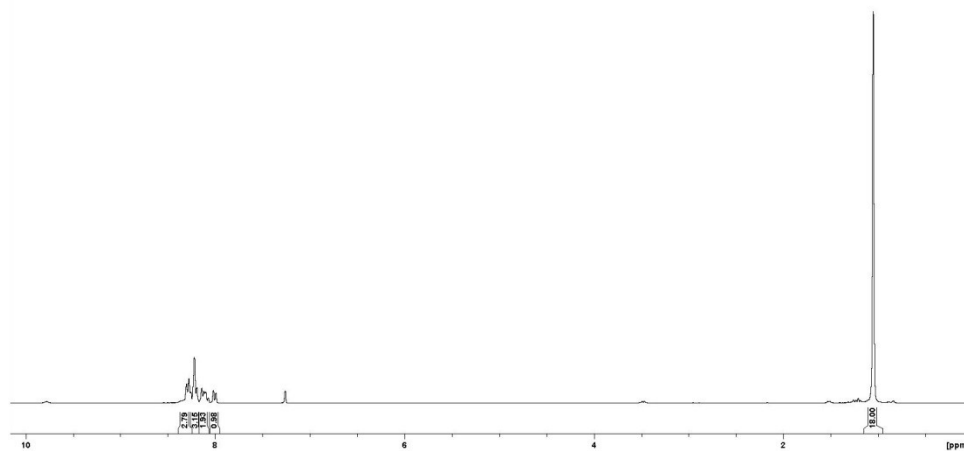

Figure S36:  $^1\text{H}$  NMR spectrum ( $[\text{CDCl}_3]$ , 300 MHz) of compound **6BF<sub>2</sub>**.



**Figure S39:**  $^{11}\text{B}$  NMR spectrum ( $[\text{CDCl}_3]$ , 96 MHz) of compound **6BF<sub>2</sub>**.

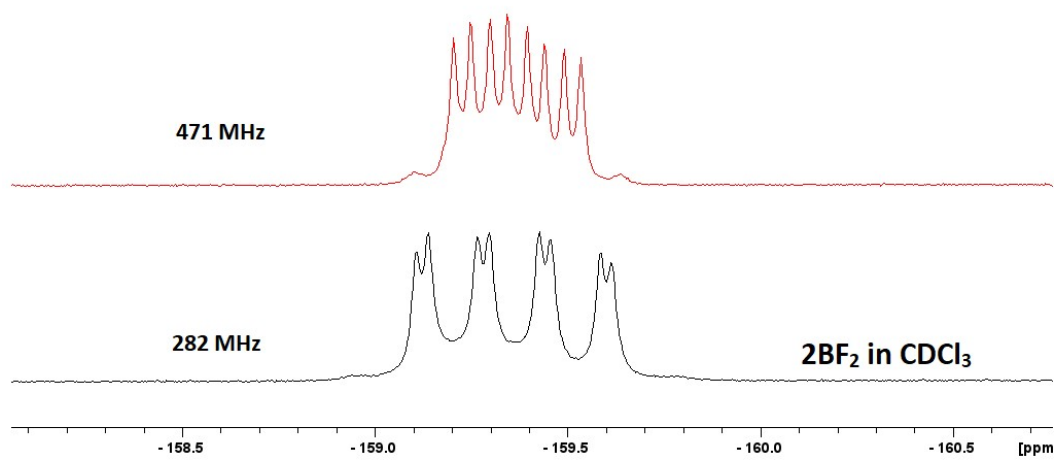

**Figure S40:**  $^{19}\text{F}$  NMR spectra of **2BF<sub>2</sub>** in  $\text{CDCl}_3$  at 282 MHz and 471 MHz instrument.

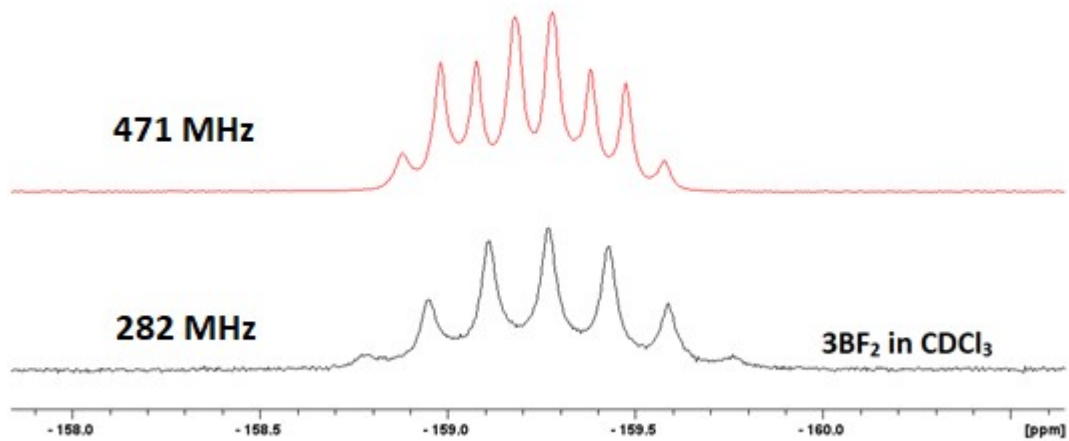

**Figure S41:**  $^{19}\text{F}$  NMR spectra of **3BF<sub>2</sub>** in  $\text{CDCl}_3$  at 282 MHz and 471 MHz instrument.

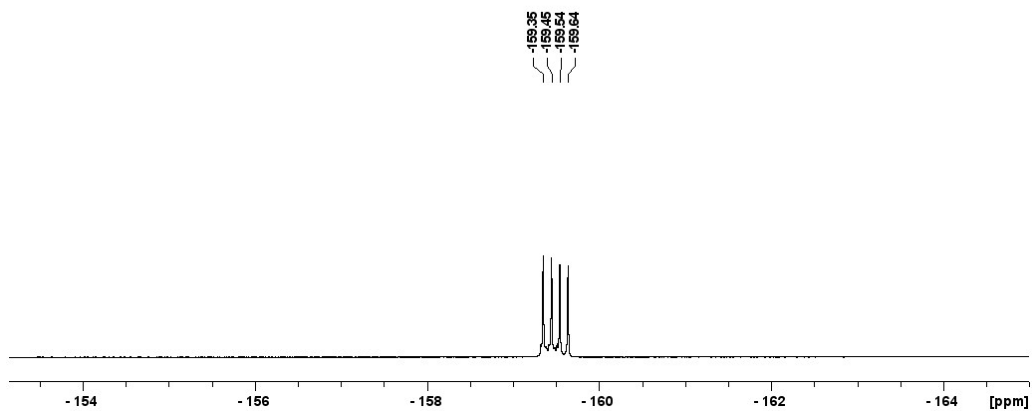

Figure S42:  $^{19}\text{F}$  NMR spectrum ( $[\text{CDCl}_3]$ , 470 MHz) of compound **1BF<sub>2</sub>**.

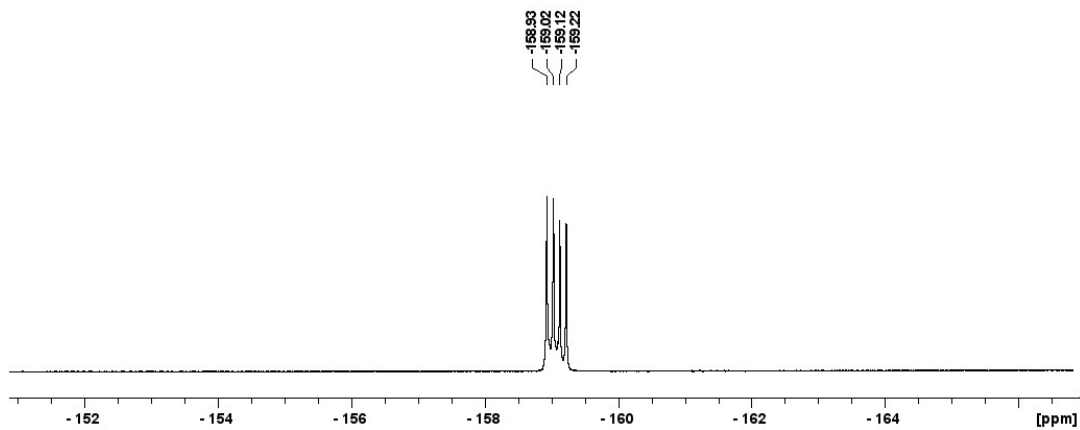

Figure S43:  $^{19}\text{F}$  NMR spectrum ( $[\text{CDCl}_3]$ , 470 MHz) of compound **4BF<sub>2</sub>**.

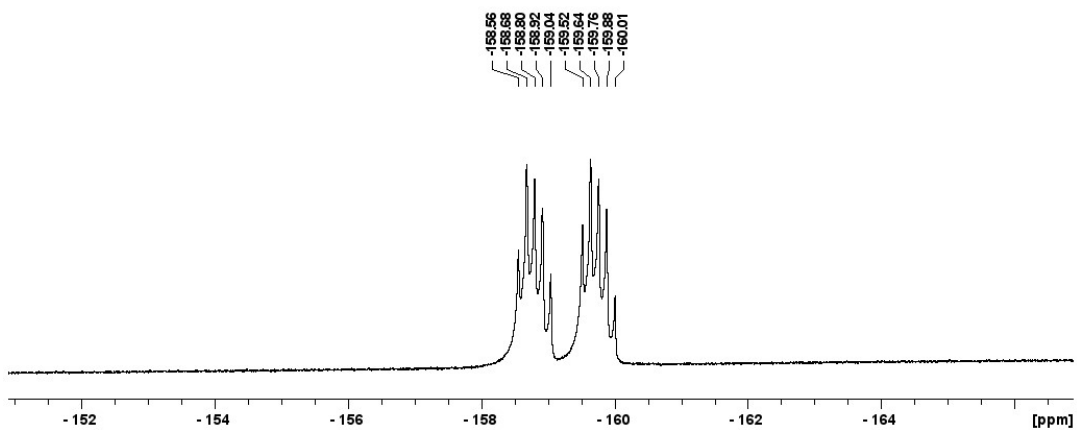

**Figure S44:**  $^{19}\text{F}$  NMR spectrum ( $[\text{CDCl}_3]$ , 376 MHz) of compound **5BF<sub>2</sub>**.

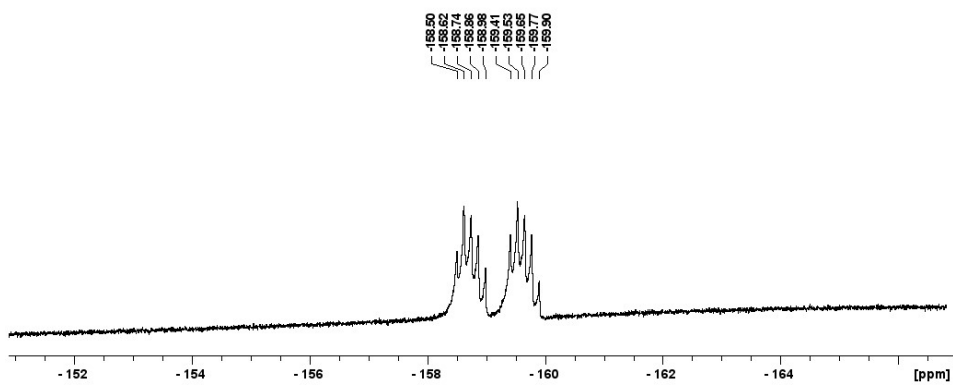

**Figure S45:**  $^{19}\text{F}$  NMR spectrum ( $[\text{CDCl}_3]$ , 376 MHz) of compound **6BF<sub>2</sub>**.

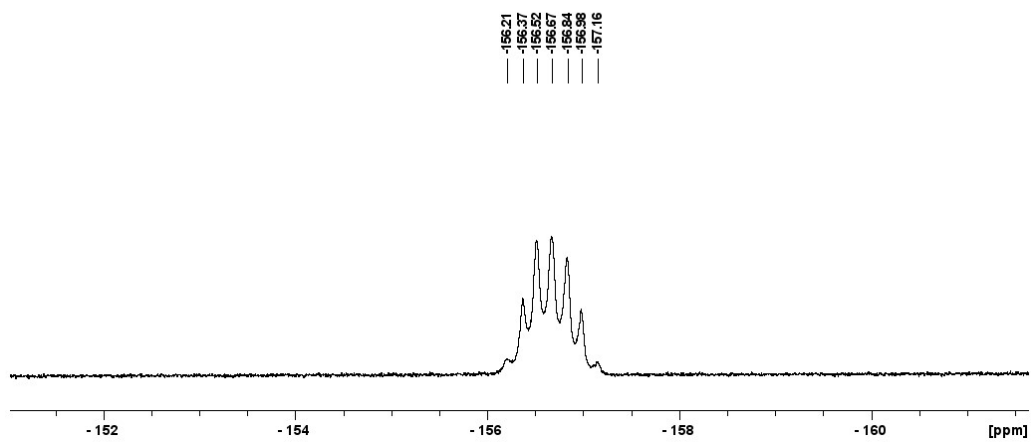

**Figure S46:**  $^{19}\text{F}$  NMR spectrum ( $[\text{dms0-d6}]$ , 282 MHz) of compound  $2\text{BF}_2$ .

## 2. Variable temperature NMR and $^1\text{H}$ - $^{19}\text{F}$ HOESY results:

### 2.2 Variable temperature NMR:

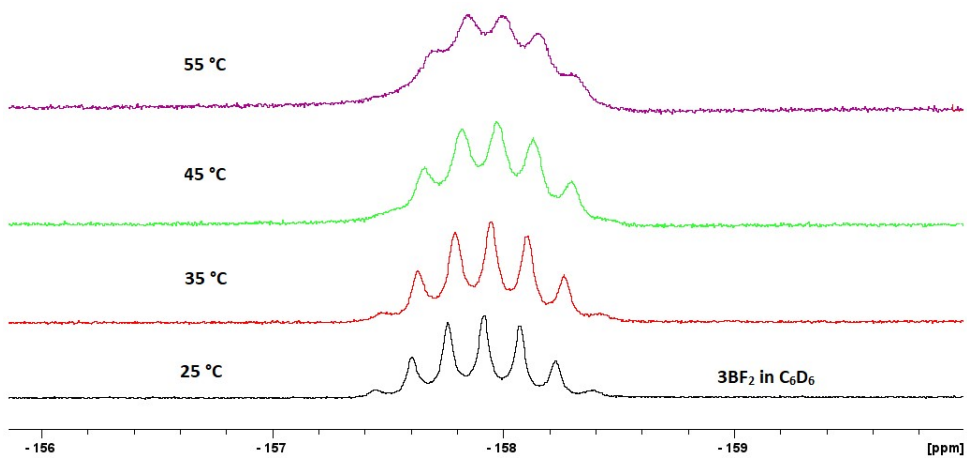

Figure S47: Variable temperature nmr spectra of  $3\text{BF}_2$  in  $\text{C}_6\text{D}_6$ .

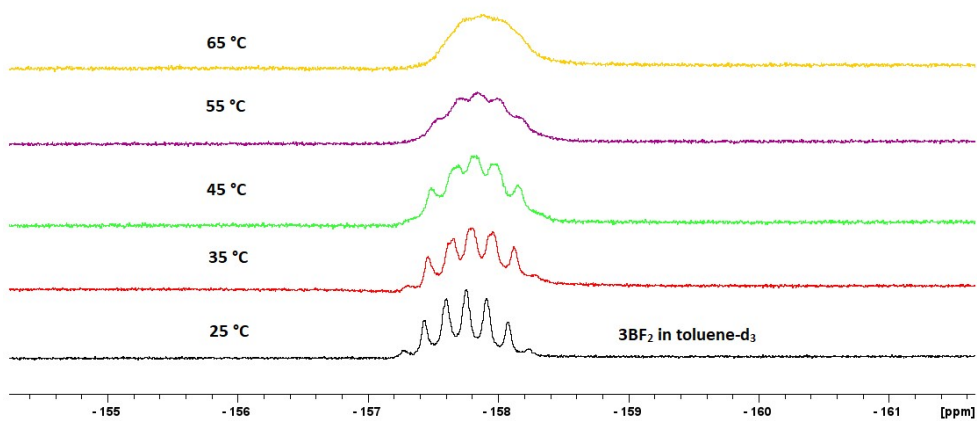

Figure S48: Variable temperature nmr spectra of  $3\text{BF}_2$  in toluene- $\text{d}_3$ .

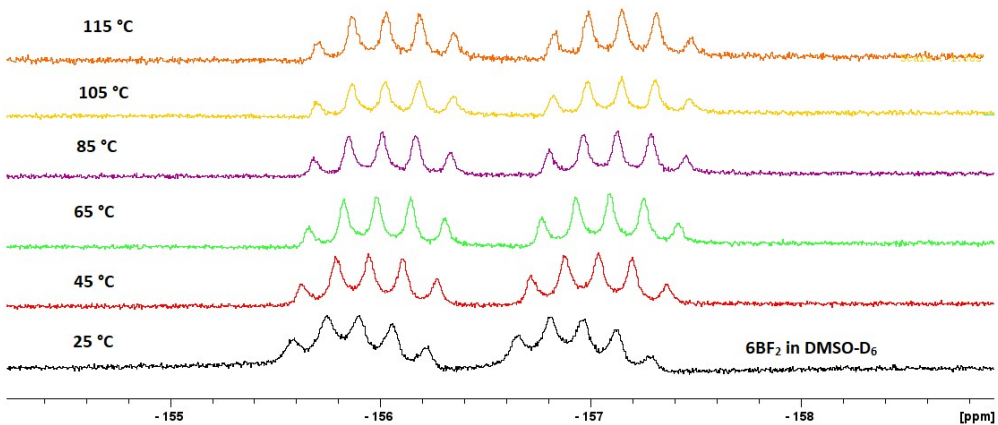

Figure S49: Variable temperature nmr spectra of  $6\text{BF}_2$  in  $\text{dmsO-d}_6$ .



## 2.2 $^1\text{H}$ - $^{19}\text{F}$ HOESY spectra:

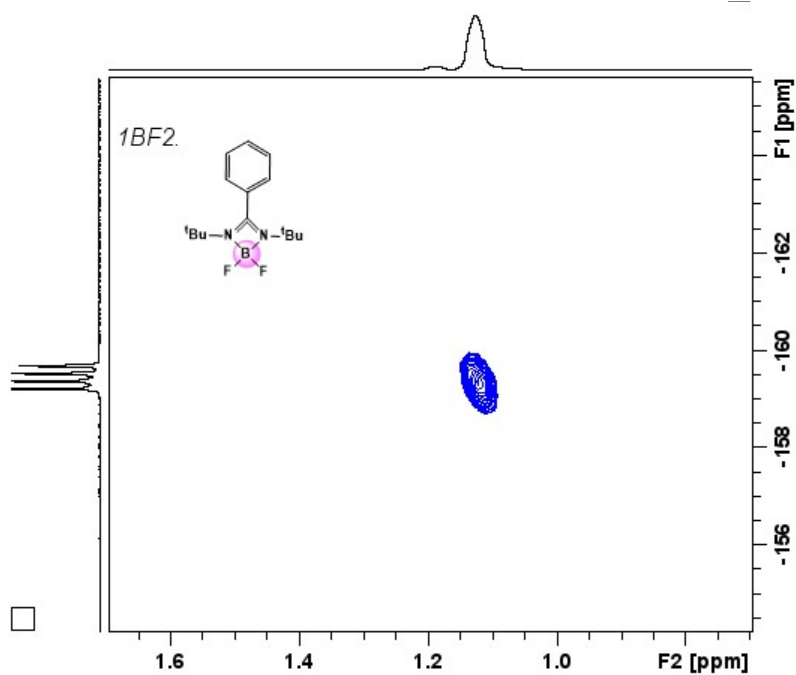

Figure S50:  $^1\text{H}$ - $^{19}\text{F}$  HOESY spectra of **1BF<sub>2</sub>**.

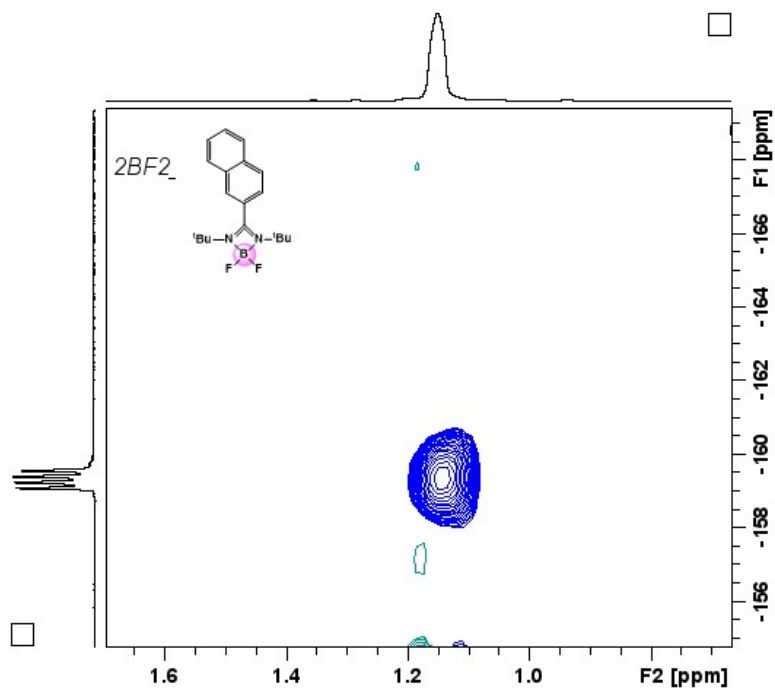

Figure S51:  $^1\text{H}$ - $^{19}\text{F}$  HOESY spectra of **2BF<sub>2</sub>**.

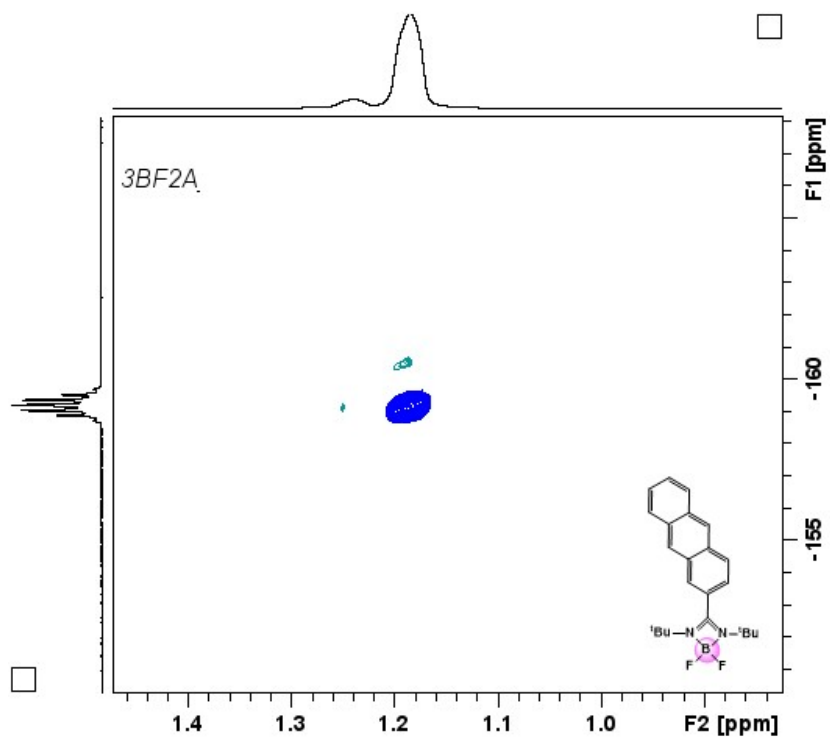

Figure S52:  $^1\text{H}$ - $^{19}\text{F}$  HOESY spectra of **3BF<sub>2</sub>**.

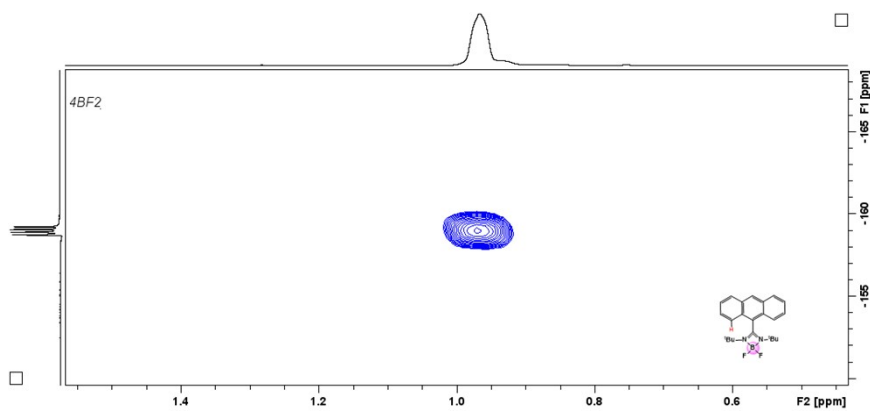

Figure S53:  $^1\text{H}$ - $^{19}\text{F}$  HOESY spectra of **4BF<sub>2</sub>**.

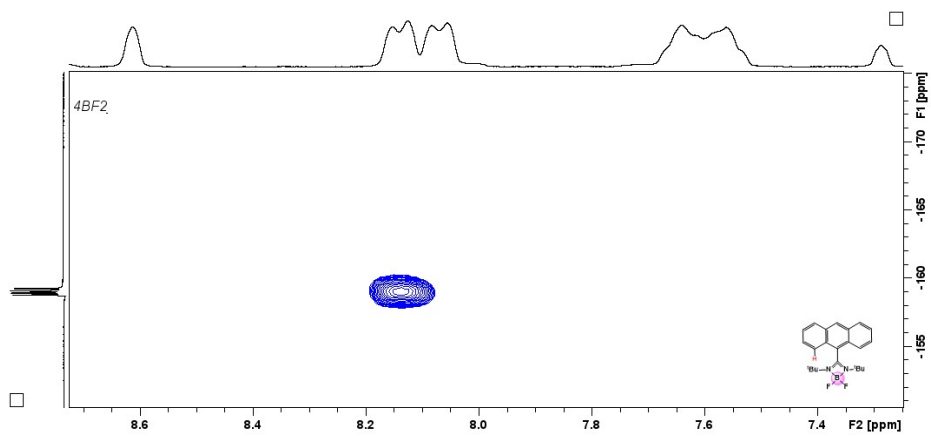

Figure S54:  $^1\text{H}$ - $^{19}\text{F}$  HOESY spectra of  $4\text{BF}_2$ .

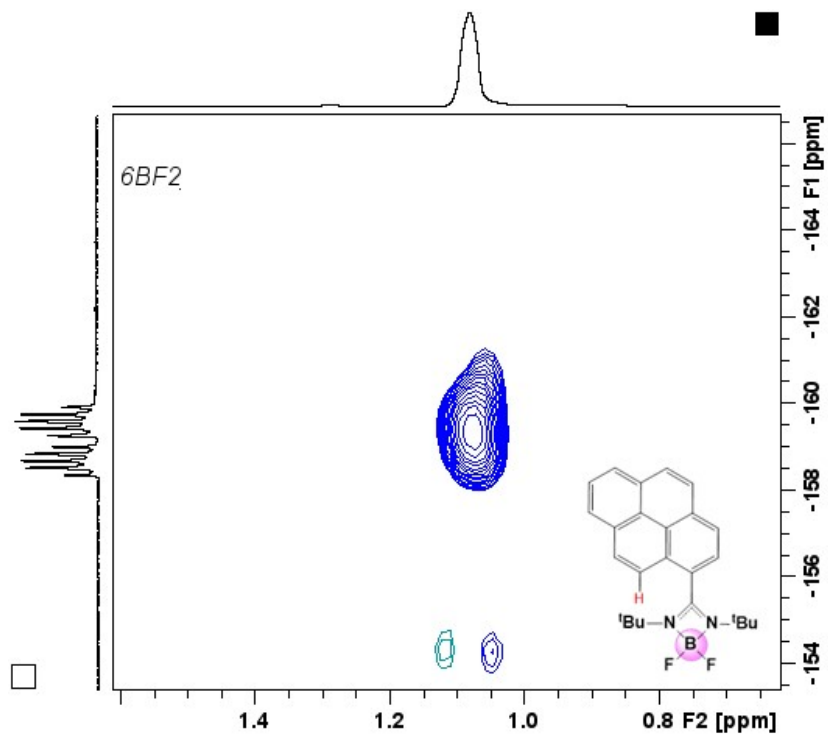

Figure S55:  $^1\text{H}$ - $^{19}\text{F}$  HOESY spectra of  $6\text{BF}_2$ .

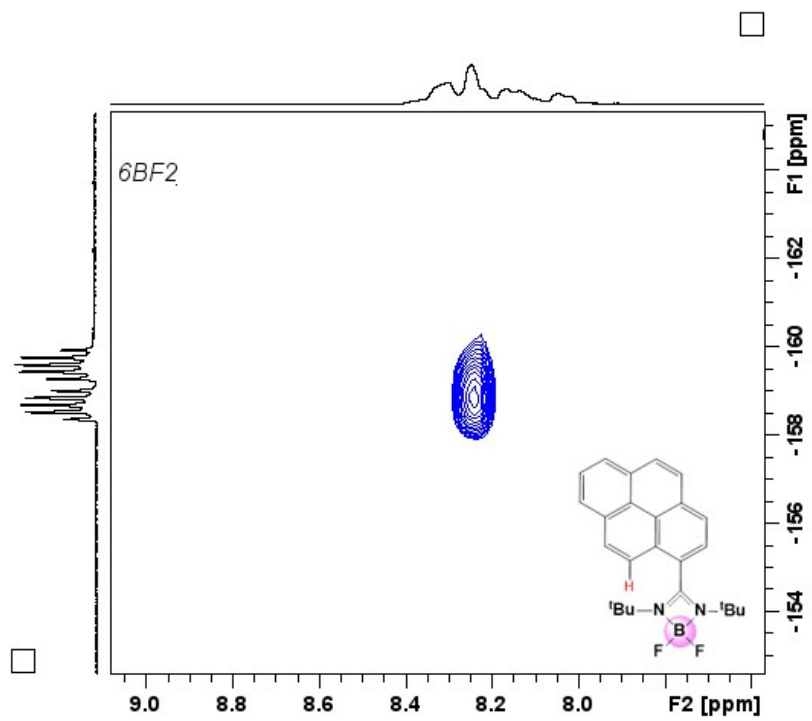

Figure S56: <sup>1</sup>H-<sup>19</sup>FHOESY spectra of **6BF<sub>2</sub>**.

### 3. Crystallography data:

**Table S1:** Crystal data and structure refinement for **1BF<sub>2</sub>**.

|                                   |                                                                 |          |
|-----------------------------------|-----------------------------------------------------------------|----------|
| Identification code               | <b>1BF<sub>2</sub></b>                                          |          |
| Empirical formula                 | C <sub>15</sub> H <sub>23</sub> B F <sub>2</sub> N <sub>2</sub> |          |
| Formula weight                    | 280.16                                                          |          |
| Temperature                       | 293(2) K                                                        |          |
| Wavelength                        | 0.71073 Å                                                       |          |
| Crystal system                    | Orthorhombic                                                    |          |
| Space group                       | P b c n                                                         |          |
| Unit cell dimensions              | a = 10.9290(4) Å                                                | ∠ = 90°. |
|                                   | b = 10.2818(4) Å                                                | ∠ = 90°. |
|                                   | c = 13.9166(5) Å                                                | ∠ = 90°. |
| Volume                            | 1563.81(10) Å <sup>3</sup>                                      |          |
| Z                                 | 4                                                               |          |
| Density (calculated)              | 1.190 Mg/m <sup>3</sup>                                         |          |
| Absorption coefficient            | 0.086 mm <sup>-1</sup>                                          |          |
| F(000)                            | 616                                                             |          |
| Crystal size                      | ? x ? x ? mm <sup>3</sup>                                       |          |
| Theta range for data collection   | 2.720 to 26.848°.                                               |          |
| Index ranges                      | -13<=h<=13, -9<=k<=13, -17<=l<=17                               |          |
| Reflections collected             | 9858                                                            |          |
| Independent reflections           | 1647 [R(int) = 0.0298]                                          |          |
| Completeness to theta = 25.242°   | 100.0 %                                                         |          |
| Absorption correction             | Semi-empirical from equivalents                                 |          |
| Max. and min. transmission        | 1.00000 and 0.84727                                             |          |
| Refinement method                 | Full-matrix least-squares on F <sup>2</sup>                     |          |
| Data / restraints / parameters    | 1647 / 0 / 93                                                   |          |
| Goodness-of-fit on F <sup>2</sup> | 1.089                                                           |          |
| Final R indices [I>2sigma(I)]     | R1 = 0.0392, wR2 = 0.1062                                       |          |
| R indices (all data)              | R1 = 0.0466, wR2 = 0.1103                                       |          |
| Extinction coefficient            | n/a                                                             |          |
| Largest diff. peak and hole       | 0.218 and -0.195 e.Å <sup>-3</sup>                              |          |

**Table S2:** Crystal data and structure refinement for **3BF<sub>2</sub>**.

|                                   |                                                                                                                                   |
|-----------------------------------|-----------------------------------------------------------------------------------------------------------------------------------|
| Identification code               | <b>3BF<sub>2</sub></b>                                                                                                            |
| Empirical formula                 | C <sub>23</sub> H <sub>27</sub> B F <sub>2</sub> N <sub>2</sub>                                                                   |
| Formula weight                    | 380.28                                                                                                                            |
| Temperature                       | 293(2) K                                                                                                                          |
| Wavelength                        | 0.71073 Å                                                                                                                         |
| Crystal system, space group       | Monoclinic, P 21/n                                                                                                                |
| Unit cell dimensions              | a = 11.8480(9) Å $\alpha = 90^\circ$ .<br>b = 9.1474(6) Å $\beta = 102.996(7)^\circ$ .<br>c = 20.2739(13) Å $\gamma = 90^\circ$ . |
| Volume                            | 2141.0(3) Å <sup>3</sup>                                                                                                          |
| Z, Calculated density             | 4, 1.180 Mg/m <sup>3</sup>                                                                                                        |
| Absorption coefficient            | 0.080 mm <sup>-1</sup>                                                                                                            |
| F(000)                            | 840                                                                                                                               |
| Crystal size                      | ? x ? x ? mm <sup>3</sup>                                                                                                         |
| Theta range for data collection   | 2.841 to 28.911°.                                                                                                                 |
| Limiting indices                  | -15<=h<=12, -12<=k<=11, -25<=l<=27                                                                                                |
| Reflections collected / unique    | 23364 / 4887 [R(int) = 0.1958]                                                                                                    |
| Completeness to theta = 25.242    | 98.3 %                                                                                                                            |
| Max. and min. transmission        | 1.00000 and 0.77081                                                                                                               |
| Refinement method                 | Full-matrix least-squares on F <sup>2</sup>                                                                                       |
| Data / restraints / parameters    | 4887 / 0 / 259                                                                                                                    |
| Goodness-of-fit on F <sup>2</sup> | 1.061                                                                                                                             |
| Final R indices [I>2sigma(I)]     | R1 = 0.0978, wR2 = 0.2886                                                                                                         |
| R indices (all data)              | R1 = 0.1472, wR2 = 0.3254                                                                                                         |
| Extinction coefficient            | n/a                                                                                                                               |
| Largest diff. peak and hole       | 0.483 and -0.269 e.Å <sup>-3</sup>                                                                                                |

**Table S3:** Crystal data and structure refinement for **4BF<sub>2</sub>**.

|                     |                                                                 |
|---------------------|-----------------------------------------------------------------|
| Identification code | <b>4BF<sub>2</sub></b>                                          |
| Empirical formula   | C <sub>23</sub> H <sub>27</sub> B F <sub>2</sub> N <sub>2</sub> |
| Formula weight      | 380.28                                                          |
| Temperature         | 106(2) K                                                        |
| Wavelength          | 0.71073 Å                                                       |

|                                   |                                                                                                                              |
|-----------------------------------|------------------------------------------------------------------------------------------------------------------------------|
| Crystal system, space group       | Triclinic, P 1                                                                                                               |
| Unit cell dimensions              | a = 9.0546(12) Å $\alpha$ = 93.097(4)°.<br>b = 13.3307(17) Å $\beta$ = 99.783(4)°.<br>c = 17.309(2) Å $\gamma$ = 95.911(4)°. |
| Volume                            | 2042.5(5) Å <sup>3</sup>                                                                                                     |
| Z, Calculated density             | 34, 1.571 Mg/m <sup>3</sup>                                                                                                  |
| Absorption coefficient            | 0.150 mm <sup>-1</sup>                                                                                                       |
| F(000)                            | 952                                                                                                                          |
| Crystal size                      | 0.397 x 0.216 x 0.170 mm                                                                                                     |
| Theta range for data collection   | 2.297 to 33.670°.                                                                                                            |
| Limiting indices                  | -14<=h<=14, -20<=k<=20, -26<=l<=26                                                                                           |
| Reflections collected / unique    | 118320 / 27416 [R(int) = 0.0405]                                                                                             |
| Completeness to theta = 25.242    | 99.3 %                                                                                                                       |
| Refinement method                 | Full-matrix least-squares on F <sup>2</sup>                                                                                  |
| Data / restraints / parameters    | 27416 / 3 / 1009                                                                                                             |
| Goodness-of-fit on F <sup>2</sup> | 1.636                                                                                                                        |
| Final R indices [I>2sigma(I)]     | R1 = 0.1462, wR2 = 0.4158                                                                                                    |
| R indices (all data)              | R1 = 0.1818, wR2 = 0.4716                                                                                                    |
| Absolute structure parameter      | 0.37(17)                                                                                                                     |
| Extinction coefficient            | n/a                                                                                                                          |
| Largest diff. peak and hole       | 2.208 and -0.740 e. Å <sup>-3</sup>                                                                                          |

**Table S4.** Crystal data and structure refinement for **5BF2**.

|                      |                                                                 |                 |
|----------------------|-----------------------------------------------------------------|-----------------|
| Identification code  | <b>5BF2</b>                                                     |                 |
| Empirical formula    | C <sub>23</sub> H <sub>27</sub> B F <sub>2</sub> N <sub>2</sub> |                 |
| Formula weight       | 56.84                                                           |                 |
| Temperature          | 293(2) K                                                        |                 |
| Wavelength           | 0.71073 Å                                                       |                 |
| Crystal system       | Monoclinic                                                      |                 |
| Space group          | P 21/c                                                          |                 |
| Unit cell dimensions | a = 12.9281(5) Å                                                | a = 90°.        |
|                      | b = 12.2645(4) Å                                                | b = 95.120(4)°. |
|                      | c = 13.2506(4) Å                                                | g = 90°.        |
| Volume               | 2092.59(12) Å <sup>3</sup>                                      |                 |
| Z                    | 30                                                              |                 |
| Density (calculated) | 1.353 Mg/m <sup>3</sup>                                         |                 |

|                                   |                                             |
|-----------------------------------|---------------------------------------------|
| Absorption coefficient            | 0.129 mm <sup>-1</sup>                      |
| F(000)                            | 840                                         |
| Crystal size                      | ? x ? x ? mm <sup>3</sup>                   |
| Theta range for data collection   | 2.842 to 30.456°.                           |
| Index ranges                      | -18<=h<=18, -16<=k<=17, -18<=l<=15          |
| Reflections collected             | 19461                                       |
| Independent reflections           | 5648 [R(int) = 0.0301]                      |
| Completeness to theta = 25.242°   | 99.6 %                                      |
| Refinement method                 | Full-matrix least-squares on F <sup>2</sup> |
| Data / restraints / parameters    | 5648 / 0 / 253                              |
| Goodness-of-fit on F <sup>2</sup> | 0.965                                       |
| Final R indices [ >2sigma(I)]     | R1 = 0.0636, wR2 = 0.2325                   |
| R indices (all data)              | R1 = 0.0957, wR2 = 0.2641                   |
| Extinction coefficient            | n/a                                         |
| Largest diff. peak and hole       | 0.474 and -0.295 e.Å <sup>-3</sup>          |

**Table S5.** Crystal data and structure refinement for **4-Li.2THF**.

|                                 |                                                                                                                  |
|---------------------------------|------------------------------------------------------------------------------------------------------------------|
| Identification code             | <b>4-Li.2THF</b>                                                                                                 |
| Empirical formula               | C H Li N O                                                                                                       |
| Formula weight                  | 49.97                                                                                                            |
| Temperature                     | 108(2) K                                                                                                         |
| Wavelength                      | 0.71073 Å                                                                                                        |
| Crystal system, space group     | Orthorhombic, P b c a                                                                                            |
| Unit cell dimensions            | a = 15.8107(8) Å    alpha = 90 deg.<br>b = 18.7330(8) Å    beta = 90 deg.<br>c = 19.3851(9) Å    gamma = 90 deg. |
| Volume                          | 5741.5(5) Å <sup>3</sup>                                                                                         |
| Z, Calculated density           | 87, 1.257 Mg/m <sup>3</sup>                                                                                      |
| Absorption coefficient          | 0.101 mm <sup>-1</sup>                                                                                           |
| F(000)                          | 2175                                                                                                             |
| Crystal size                    | 0.347 x 0.307 x 0.299 mm                                                                                         |
| Theta range for data collection | 2.415 to 31.453 deg.                                                                                             |
| Limiting indices                | -22<=h<=22, -25<=k<=27, -19<=l<=28                                                                               |
| Reflections collected / unique  | 51987 / 9292 [R(int) = 0.0490]                                                                                   |
| Completeness to theta = 25.242  | 99.6 %                                                                                                           |
| Refinement method               | Full-matrix least-squares on F <sup>2</sup>                                                                      |



|                                   |                                    |
|-----------------------------------|------------------------------------|
| Data / restraints / parameters    | 9292 / 0 / 331                     |
| Goodness-of-fit on F <sup>2</sup> | 1.038                              |
| Final R indices [I > 2σ(I)]       | R1 = 0.0937, wR2 = 0.2569          |
| R indices (all data)              | R1 = 0.1143, wR2 = 0.2765          |
| Extinction coefficient            | n/a                                |
| Largest diff. peak and hole       | 1.601 and -1.157 e.Å <sup>-3</sup> |

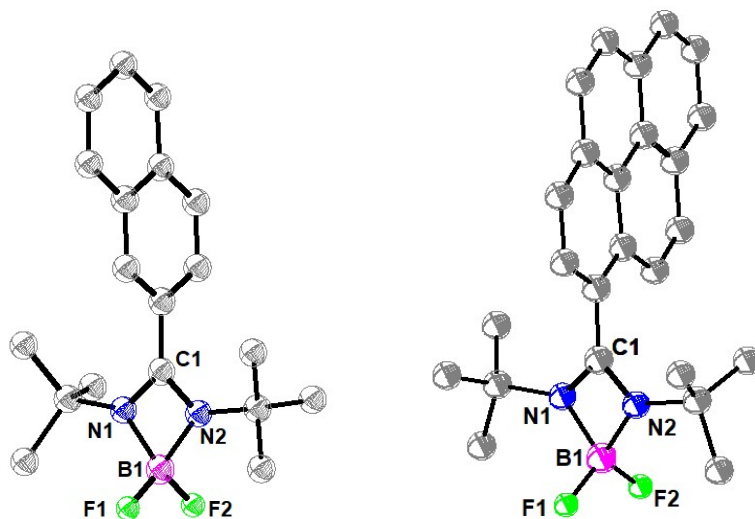

Figure S57: Solid-state structure diagram for compounds **2BF<sub>2</sub>** (left) and **6BF<sub>2</sub>** (right).

**4-Li.2THF:**

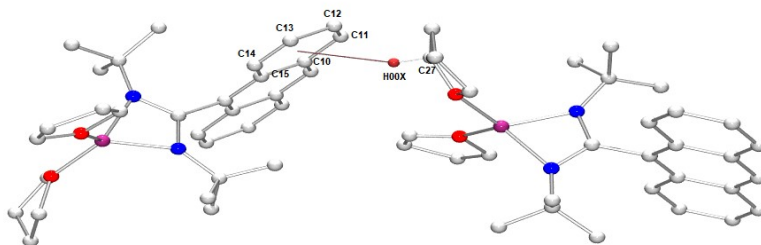

**4-BF<sub>2</sub>:**

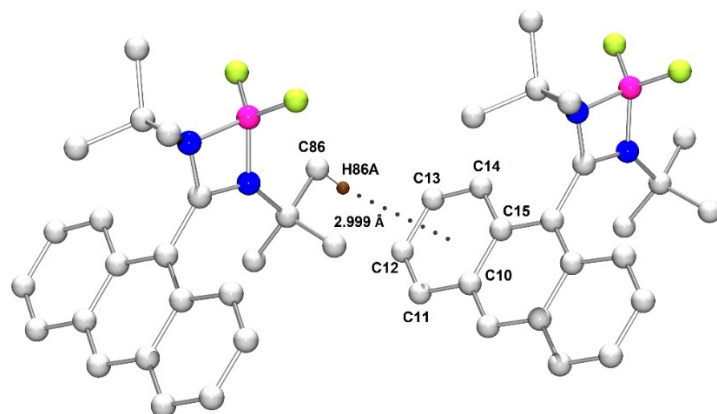

**5-BF<sub>2</sub>:**

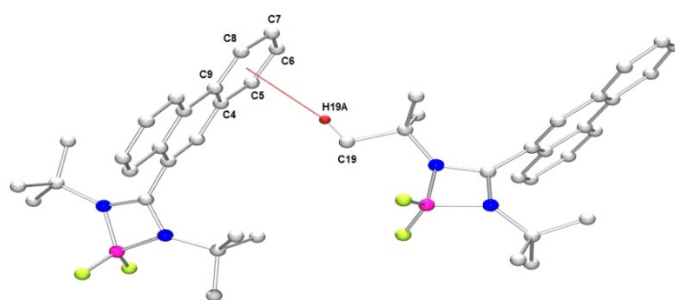

**Fig. S58:** Two-and 3- dimensional layer structures in the crystals of **4-Li.2THF** (top), **4-BF<sub>2</sub>** and **5BF<sub>2</sub>** (bottom) with a C–H···π interactions (black line) in the layer structures.

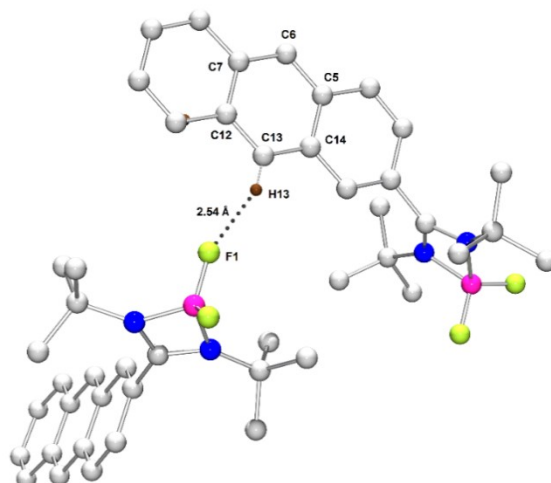

**Fig. S59:** Two-dimensional layer structure in the crystal of **3BF<sub>2</sub>** with a C–H···F Hydrogen bonding interactions (black line) in the layer structures.

**Table S6:** Summary of photophysical properties of **1BF2-6BF2** in different solvents

| Compounds    | Solvent                         | $\lambda_{\text{abs}}^a$ /nm ( $\epsilon \times 10^3/\text{M}^{-1} \text{cm}^{-1}$ ) | $\lambda_{\text{ems}}^b$ (nm) | $\Phi_{\text{F}}^c$ (%) | $\tau^d$ (ns) |
|--------------|---------------------------------|--------------------------------------------------------------------------------------|-------------------------------|-------------------------|---------------|
| <b>1BF2</b>  | Toluene                         | -                                                                                    | 297                           | <0.1                    |               |
|              | THF                             | 263(6.4)                                                                             | 335, 349                      | <0.1                    |               |
|              | CH <sub>2</sub> Cl <sub>2</sub> | 262(3.6)                                                                             | 333, 353, 367                 | <0.1                    | 0.1           |
|              | CH <sub>3</sub> CN              | 265(2.1)                                                                             | 365, 385                      | <0.1                    |               |
| <b>2BF2</b>  | Toluene                         | 286(0.7), 321(0.1)                                                                   | 354, 370                      | 1.64                    |               |
|              | THF                             | 278(3.6), 322(0.3)                                                                   | 334, 352                      | 0.98                    |               |
|              | CH <sub>2</sub> Cl <sub>2</sub> | 279(4.8), 321(0.7)                                                                   | 356, 374, 414                 | 1.07                    | 0.6           |
|              | CH <sub>3</sub> CN              | 279(3.5), 321(0.7)                                                                   | 370, 420                      | 0.64                    |               |
| <b>3BF2</b>  | Toluene                         | 329(3.2), 346(5.3), 364(7.0), 384(5.9)                                               | 448, 472                      | 18.9                    |               |
|              | THF                             | 329(2.7), 345(4.3), 362(5.7), 382(4.7)                                               | 455, 477                      | 18.0                    |               |
|              | CH <sub>2</sub> Cl <sub>2</sub> | 328(2.5), 346(3.9), 363(5.0), 384(4.2)                                               | 455, 485                      | 48.1                    | 11.8          |
|              | CH <sub>3</sub> CN              | 328(2.6), 344(4.0), 360(5.0), 381(4.1)                                               | 456, 504                      | 39.4                    |               |
| <b>4-BF2</b> | Toluene                         | 334(2.3), 351(4.5), 368(6.4), 389(5.5)                                               | 404, 418, 440, 466            | 8.7                     |               |
|              | THF                             | 334(3.2), 350(6.0), 368(8.7), 388(7.5)                                               | 402, 418, 442, 470            | 10.9                    |               |
|              | CH <sub>2</sub> Cl <sub>2</sub> | 335(3.0), 350(5.5), 368(7.7), 389(6.5)                                               | 420, 440, 470                 | 17.5                    | 3.5           |
|              | CH <sub>3</sub> CN              | 332(2.4), 349(4.4), 367(6.1), 387(5.0)                                               | 417, 440, 469                 | 12.2                    |               |
| <b>5BF2</b>  | Toluene                         | 291(8.0), 303(8.1)                                                                   | 360, 372                      | <0.1                    |               |
|              | THF                             | 290(19.1), 302(8.3)                                                                  | 332, 350                      | <0.1                    |               |
|              | CH <sub>2</sub> Cl <sub>2</sub> | 291(9.3), 302(8.9)                                                                   | 400, 422                      | <0.1                    | 0.6           |
|              | CH <sub>3</sub> CN              | 290(9.4), 301(9.3)                                                                   | 370, 388                      | <0.1                    |               |
| <b>6BF2</b>  | Toluene                         | 330(11.0), 346(14.6)                                                                 | 380, 430, 468                 | 4.9                     |               |
|              | THF                             | 265(13.9), 277(17.0), 329(14.7), 345(19.8)                                           | 404, 446, 470                 | 12.0                    |               |
|              | CH <sub>2</sub> Cl <sub>2</sub> | 267(12.4), 277(15.7), 329(12.0), 345(16.4)                                           | 450, 472                      | 22.7                    | 2.7           |
|              | CH <sub>3</sub> CN              | 268(8.0), 276(10.8), 327(8.0), 343(11.3)                                             | 446, 470                      | 8.1                     |               |

<sup>a</sup>Absorption maximum (concentration = 10<sup>-4</sup> M), <sup>b</sup>Excited at  $\lambda_{\text{max}}$ , <sup>c</sup>Absolute fluorescence quantum yield using integrating sphere. <sup>d</sup>Fluorescence life-time.

**Table S7:** Reduction potentials and HOMO-LUMO gap derived from experiments and DFT studies.

| Electrochemical        |                                     | Experimental               |                      |                      | DFT     |         |                    |
|------------------------|-------------------------------------|----------------------------|----------------------|----------------------|---------|---------|--------------------|
| Compounds              | ( $E^{1/2}_{red}$ ), V <sup>a</sup> | HOMO-LUMO gap <sup>b</sup> | LUMO <sup>c</sup> eV | HOMO <sup>d</sup> eV | HOMO eV | LUMO eV | HOMO-LUMO gap (eV) |
| <b>1BF<sub>2</sub></b> | -2.13                               | 4.46                       | -2.46                | -6.92                | -6.133  | -1.08   | 5.05               |
| <b>2BF<sub>2</sub></b> | -2.02                               | 3.91                       | -2.61                | -6.52                | -6.104  | -1.629  | 4.47               |
| <b>3BF<sub>2</sub></b> | -2.58                               | 3.12                       | -2.01                | -5.13                | -5.674  | -2.158  | 3.51               |
| <b>4BF<sub>2</sub></b> | -2.29                               | 3.12                       | -2.37                | -5.49                | -5.649  | -2.146  | 3.50               |
| <b>5BF<sub>2</sub></b> | -2.17                               | 3.91                       | -2.56                | -6.47                | -6.087  | -1.515  | 4.44               |
| <b>6BF<sub>2</sub></b> | -2.80                               | 3.47                       | -1.88                | -5.35                | -5.731  | -1.991  | 3.74               |

<sup>a</sup>Reduction potential values ( $E^{1/2}_{red}$ ) V of compounds **1BF<sub>2</sub>-6BF<sub>2</sub>** (vs. Ferrocene/Ferrocenium) with 0.1 M Bu<sub>4</sub>NPF<sub>6</sub> in THF as the supporting electrolyte (scan rate 100 mV/s). <sup>b</sup>Absorption onset of the longest wavelength of UV band. <sup>c</sup>Calculated from  $E_{pc}$  of the reduction wave with reference to Fc/Fc<sup>+</sup>. <sup>d</sup>Calculated from HOMO-LUMO gap and LUMO.

#### 4. Computational studies

**Table S8:** Calculated electronic transitions for compound **1BF<sub>2</sub>-6BF<sub>2</sub>** from TD-DFT (B3LYP) calculations

| Compound                       | Transition                     | MO contributions | Energy gap eV (nm) | Oscillator strength/f |
|--------------------------------|--------------------------------|------------------|--------------------|-----------------------|
| <b>1BF<sub>2</sub></b>         | S <sub>0</sub> →S <sub>1</sub> | HOMO→LUMO        | 4.38 (282)         | 0.0413                |
|                                |                                | HOMO→LUMO+2      |                    |                       |
|                                | S <sub>0</sub> →S <sub>2</sub> | HOMO→LUMO+1      | 4.79 (258)         | 0.0022                |
|                                |                                | HOMO-2→LUMO      |                    |                       |
| S <sub>0</sub> →S <sub>3</sub> | HOMO-2→LUMO                    | 5.28 (234)       | 0.0012             |                       |
|                                | HOMO-1→LUMO+1                  |                  |                    |                       |
| <b>2BF<sub>2</sub></b>         | S <sub>0</sub> →S <sub>1</sub> | HOMO→LUMO        | 3.85 (321)         | 0.0122                |
|                                | S <sub>0</sub> →S <sub>2</sub> | HOMO-2→LUMO      | 4.27 (290)         | 0.0323                |
|                                |                                | HOMO-2→LUMO+1    |                    |                       |

|                        |                       |                                                                                            |            |        |
|------------------------|-----------------------|--------------------------------------------------------------------------------------------|------------|--------|
|                        | $S_0 \rightarrow S_3$ | HOMO-1→LUMO<br>HOMO-1→LUMO+1<br>HOMO-2→LUMO<br>HOMO-1→LUMO<br>HOMO-1→LUMO+1<br>HOMO→LUMO+1 | 4.39 (281) | 0.0113 |
| <b>3BF<sub>2</sub></b> | $S_0 \rightarrow S_1$ | HOMO-2→LUMO+1<br>HOMO→LUMO                                                                 | 3.18 (389) | 0.0466 |
|                        | $S_0 \rightarrow S_2$ | HOMO-1→LUMO                                                                                | 3.40 (363) | 0.0060 |
|                        | $S_0 \rightarrow S_3$ | HOMO-2→LUMO<br>HOMO→LUMO+1                                                                 | 3.79 (326) | 0.0004 |
| <b>4BF<sub>2</sub></b> | $S_0 \rightarrow S_1$ | HOMO-2→LUMO+1<br>HOMO→LUMO                                                                 | 3.17 (390) | 0.0942 |
|                        | $S_0 \rightarrow S_2$ | HOMO-1→LUMO                                                                                | 3.21 (386) | 0.0013 |
|                        | $S_0 \rightarrow S_3$ | HOMO-2→LUMO<br>HOMO→LUMO+1                                                                 | 3.87 (320) | 0.0035 |
| <b>5BF<sub>2</sub></b> | $S_0 \rightarrow S_1$ | HOMO-1→LUMO<br>HOMO→LUMO                                                                   | 3.79 (326) | 0.0100 |
|                        | $S_0 \rightarrow S_2$ | HOMO-2→LUMO<br>HOMO-1→LUMO+1<br>HOMO→LUMO+1                                                | 3.95 (313) | 0.0003 |
|                        | $S_0 \rightarrow S_3$ | HOMO-2→LUMO+1<br>HOMO-1→LUMO                                                               | 4.15 (298) | 0.1001 |

|                        |                                | HOMO→LUMO     |            |        |
|------------------------|--------------------------------|---------------|------------|--------|
| <b>6BF<sub>2</sub></b> | S <sub>0</sub> →S <sub>1</sub> | HOMO-1→LUMO   | 3.49 (355) | 0.0126 |
|                        |                                | HOMO→LUMO     |            |        |
|                        | S <sub>0</sub> →S <sub>2</sub> | HOMO-2→LUMO+1 | 3.58 (345) | 0.3303 |
|                        |                                | HOMO-1→LUMO   |            |        |
|                        |                                | HOMO→LUMO     |            |        |
|                        | S <sub>0</sub> →S <sub>3</sub> | HOMO-2→LUMO   | 3.74 (331) | 0.0048 |
| HOMO→LUMO+1            |                                |               |            |        |

**Table S9:** Computed orbitals for compounds **1-6BF<sub>2</sub>**

| Compound | <b>1BF<sub>2</sub></b>                                                                                   | <b>2BF<sub>2</sub></b>                                                                                   | <b>3BF<sub>2</sub></b>                                                                                      |
|----------|----------------------------------------------------------------------------------------------------------|----------------------------------------------------------------------------------------------------------|-------------------------------------------------------------------------------------------------------------|
| LUMO+2   | 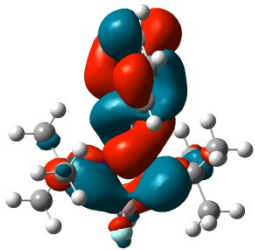 <p>-0.031 eV(78)</p>  |  <p>-0.134 eV(91)</p> |  <p>-0.380 eV(104)</p> |
| LUMO+1   |  <p>-0.641 eV(77)</p> |                      |                        |

|        |                                                                                                          |                                                                                                           |                                                                                                             |
|--------|----------------------------------------------------------------------------------------------------------|-----------------------------------------------------------------------------------------------------------|-------------------------------------------------------------------------------------------------------------|
|        |                                                                                                          | -0.953 eV(90)                                                                                             | -0.992 eV(103)                                                                                              |
| LUMO   | 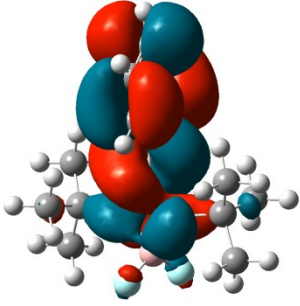 <p>-1.080 eV(76)</p>   |  <p>-1.629 eV(89)</p>   |  <p>-2.158 eV(102)</p>   |
| HOMO   |  <p>-6.133 eV(75)</p>  |  <p>-6.104 eV(88)</p>  |  <p>-5.674 eV(101)</p>  |
| HOMO-1 |  <p>-7.218 eV(74)</p> |  <p>-6.331 eV(87)</p> |  <p>-6.115 eV(100)</p> |

|          |                                                                                                       |                                                                                                        |                                                                                                         |
|----------|-------------------------------------------------------------------------------------------------------|--------------------------------------------------------------------------------------------------------|---------------------------------------------------------------------------------------------------------|
| HOMO-2   | 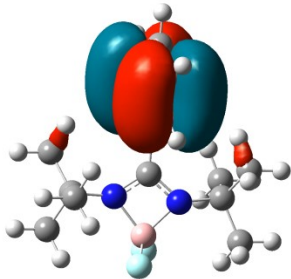                     |                      |                      |
| Compound | $4\text{BF}_2$<br>-7.384 eV(73)                                                                       | $5\text{BF}_2$                                                                                         | $6\text{BF}_2$                                                                                          |
| LUMO+2   | <br>-0.437 eV(104)  | <br>-0.489 eV(104)   | <br>-0.549 eV(110)  |
| LUMO+1   | <br>-0.724 eV(103) | <br>-1.237 eV(103) | <br>-1.079 eV(109) |



|        |                                                                                                                                         |                                                                                                                                           |                                                                                                                                             |
|--------|-----------------------------------------------------------------------------------------------------------------------------------------|-------------------------------------------------------------------------------------------------------------------------------------------|---------------------------------------------------------------------------------------------------------------------------------------------|
| LUMO   | 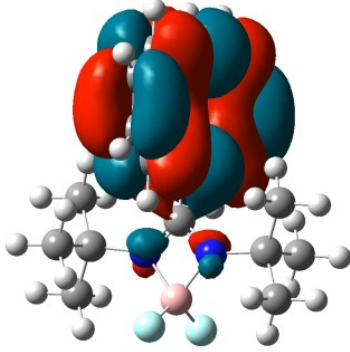 <p data-bbox="467 611 683 653">-2.146 eV(102)</p>     |  <p data-bbox="862 611 1078 653">-1.600 eV(102)</p>     |  <p data-bbox="1256 611 1472 653">-1.991 eV(108)</p>     |
| HOMO   |  <p data-bbox="467 1087 683 1129">-5.649 eV(101)</p>  |  <p data-bbox="862 1108 1078 1150">-6.048 eV(101)</p>  |  <p data-bbox="1256 1108 1472 1150">-5.731 eV(107)</p>  |
| HOMO-1 |  <p data-bbox="467 1556 683 1598">-6.028 eV(100)</p> |  <p data-bbox="862 1640 1078 1682">-6.227 eV(100)</p> |  <p data-bbox="1256 1640 1472 1682">-6.079 eV(106)</p> |

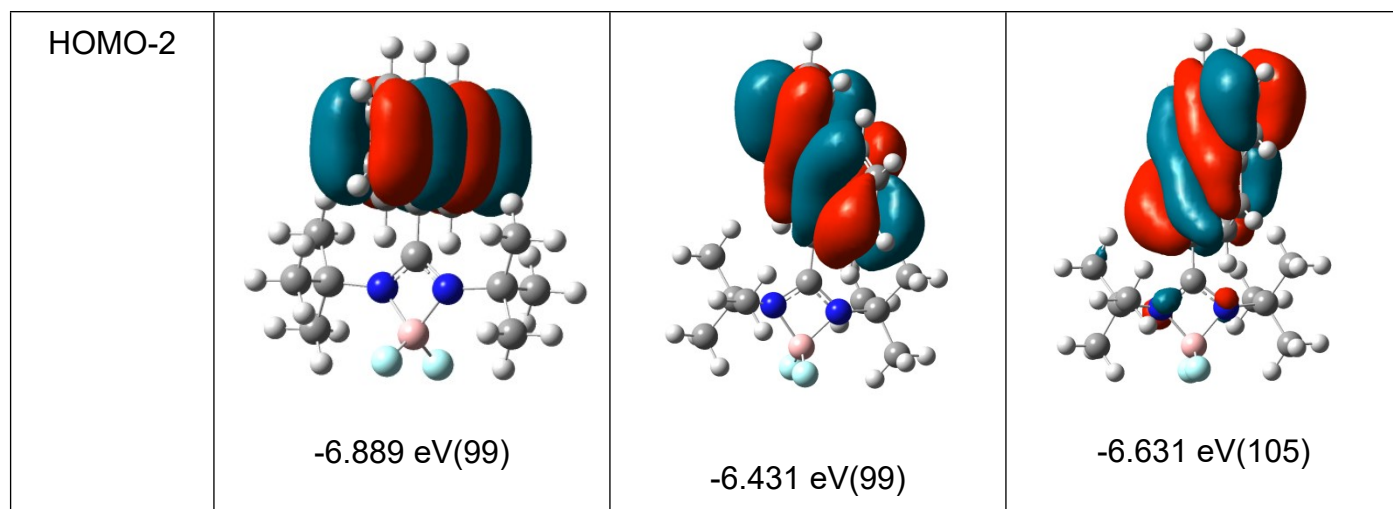

Compound 1BF<sub>2</sub>

Center Atomic Atomic Coordinates (Angstroms)

Number Number Type X Y Z

```

-----
1 9 0 2.814379 0.305490 -1.106761
2 7 0 0.846662 1.019607 0.249890
3 6 0 0.012392 -0.000005 -0.000009
4 6 0 -1.473061 -0.000113 -0.000006
5 6 0 0.723900 2.471013 -0.010685
6 6 0 -2.178504 0.192451 1.196090
7 1 0 -1.631389 0.345757 2.120713
8 6 0 -0.419234 3.099995 0.803656
9 1 0 -0.404087 4.187221 0.675233
10 1 0 -1.399352 2.740441 0.483094
11 1 0 -0.300889 2.882465 1.869699
12 6 0 2.062899 3.088614 0.431345
13 1 0 2.044525 4.172585 0.283687
14 1 0 2.250577 2.885277 1.489825
15 1 0 2.889756 2.672752 -0.149309
16 6 0 -3.572906 0.183754 1.194652
17 1 0 -4.112775 0.324740 2.126043
18 6 0 -4.271668 -0.000303 0.000004
19 1 0 -5.357511 -0.000378 0.000007
20 6 0 0.509481 2.714564 -1.518843
21 1 0 0.508264 3.787558 -1.738635

```

22 1 0 1.309039 2.241097 -2.094308  
23 1 0 -0.449997 2.302990 -1.849110  
24 5 0 2.061189 0.000161 -0.000006  
25 9 0 2.814423 -0.305055 1.106750  
26 7 0 0.846829 -1.019487 -0.249894  
27 6 0 0.724322 -2.470915 0.010690  
28 6 0 -2.178486 -0.192769 -1.196098  
29 1 0 -1.631356 -0.345997 -2.120726  
30 6 0 -0.418718 -3.100115 -0.803615  
31 1 0 -0.403379 -4.187335 -0.675163  
32 1 0 -1.398893 -2.740726 -0.483046  
33 1 0 -0.300429 -2.882594 -1.869667  
34 6 0 2.063420 -3.088274 -0.431374  
35 1 0 2.045245 -4.172249 -0.283712  
36 1 0 2.251034 -2.884906 -1.489858  
37 1 0 2.890216 -2.672262 0.149259  
38 6 0 -3.572888 -0.184264 -1.194650  
39 1 0 -4.112745 -0.325323 -2.126038  
40 6 0 0.509991 -2.714500 1.518856  
41 1 0 0.508970 -3.787494 1.738652  
42 1 0 1.309482 -2.240889 2.094296  
43 1 0 -0.449550 -2.303094 1.849149

-----  
Compound 2BF<sub>2</sub>

Center Atomic Atomic Coordinates (Angstroms)  
Number Number Type X Y Z

-----  
1 9 0 -3.497909 -0.175308 -1.412580  
2 9 0 -3.795735 0.378285 0.795675  
3 7 0 -1.628647 1.050919 -0.243122  
4 6 0 -0.875032 -0.006008 0.093169  
5 6 0 0.592249 -0.064992 0.312458  
6 6 0 2.869544 0.079978 -0.547783  
7 6 0 1.464708 0.146337 -0.737875  
8 1 0 1.075484 0.363359 -1.728323  
9 7 0 -1.772541 -0.998422 0.189980  
10 6 0 3.380538 -0.194111 0.762718  
11 6 0 3.784945 0.281815 -1.615853  
12 1 0 3.394243 0.489086 -2.608388  
13 6 0 2.459946 -0.398178 1.825920  
14 1 0 2.845558 -0.602691 2.820963  
15 6 0 -1.490717 2.490495 0.072734  
16 6 0 5.647394 -0.053582 -0.102985  
17 1 0 6.720738 -0.102291 0.054071  
18 6 0 -1.661648 -2.446589 -0.094205

19 6 0 4.786714 -0.253803 0.952368  
20 1 0 5.172637 -0.461452 1.946757  
21 6 0 1.103502 -0.345205 1.610879  
22 1 0 0.408647 -0.511514 2.427252  
23 6 0 5.142177 0.216627 -1.398729  
24 1 0 5.832945 0.372592 -2.221796  
25 5 0 -2.901363 0.072252 -0.200687  
26 6 0 -0.266020 3.108082 -0.624296  
27 1 0 -0.302491 2.924101 -1.702588  
28 1 0 -0.260828 4.191284 -0.464313  
29 1 0 0.673331 2.709011 -0.235932  
30 6 0 -2.769562 3.159243 -0.463037  
31 1 0 -2.868740 2.993708 -1.539946  
32 1 0 -3.653560 2.747836 0.029442  
33 1 0 -2.735849 4.237224 -0.278885  
34 6 0 -1.209888 -2.661686 -1.553499  
35 1 0 -0.196231 -2.279014 -1.711320  
36 1 0 -1.208259 -3.728428 -1.801702  
37 1 0 -1.888547 -2.145459 -2.237395  
38 6 0 -1.400901 2.687493 1.599652  
39 1 0 -1.390161 3.753803 1.849562  
40 1 0 -2.261058 2.224159 2.090338  
41 1 0 -0.485579 2.240146 2.000953  
42 6 0 -0.692918 -3.141243 0.877523  
43 1 0 -0.986577 -2.955525 1.915342  
44 1 0 -0.715182 -4.222452 0.706570  
45 1 0 0.337335 -2.804552 0.743179  
46 6 0 -3.076451 -3.020548 0.101389  
47 1 0 -3.428490 -2.839394 1.121288  
48 1 0 -3.780391 -2.554036 -0.591780  
49 1 0 -3.072518 -4.099788 -0.079051

-----  
Compound 3BF<sub>2</sub>

-----  
Center Atomic Atomic Coordinates (Angstroms)  
Number Number Type X Y Z

-----  
1 9 0 -4.792862 0.416747 0.546517  
2 9 0 -4.302900 -0.057422 -1.646138  
3 7 0 -2.749526 -0.982294 0.073172  
4 7 0 -2.526443 1.079317 -0.259967  
5 6 0 -0.389594 -0.109468 0.452870  
6 6 0 2.346093 -0.336750 1.166159  
7 6 0 4.323366 0.187795 -0.805754  
8 6 0 -1.827767 -0.007336 0.101118

9 6 0 1.965585 0.042975 -0.174405  
10 6 0 0.577443 0.154111 -0.488612  
11 1 0 0.289689 0.448449 -1.493542  
12 6 0 4.704495 -0.193122 0.535412  
13 6 0 2.963937 0.295138 -1.123751  
14 1 0 2.676240 0.581232 -2.132613  
15 6 0 3.704656 -0.443855 1.484204  
16 1 0 3.991560 -0.729947 2.493325  
17 6 0 -2.639279 -2.418445 -0.269155  
18 6 0 5.352621 0.441984 -1.765125  
19 1 0 5.063578 0.728485 -2.772715  
20 6 0 -0.008585 -0.492386 1.780234  
21 1 0 -0.784887 -0.696148 2.509974  
22 6 0 6.674208 0.327188 -1.425040  
23 1 0 7.446143 0.522816 -2.163208  
24 6 0 1.312480 -0.591631 2.121000  
25 1 0 1.595912 -0.872446 3.131618  
26 6 0 6.095493 -0.301184 0.847007  
27 1 0 6.380473 -0.588034 1.855640  
28 6 0 -2.398838 2.499148 0.141404  
29 6 0 7.050273 -0.049391 -0.102170  
30 1 0 8.103410 -0.135208 0.148146  
31 5 0 -3.815975 0.128681 -0.375359  
32 6 0 -2.048813 -2.575339 -1.685286  
33 1 0 -2.644798 -2.009313 -2.405845  
34 1 0 -2.045120 -3.628680 -1.985227  
35 1 0 -1.016722 -2.211806 -1.721691  
36 6 0 -4.077687 -2.966250 -0.241737  
37 1 0 -4.526012 -2.823672 0.746070  
38 1 0 -4.077049 -4.035954 -0.471940  
39 1 0 -4.699570 -2.451678 -0.977927  
40 6 0 -1.787072 -3.181942 0.758323  
41 1 0 -0.741713 -2.865853 0.744189  
42 1 0 -1.814449 -4.253099 0.533128  
43 1 0 -2.179962 -3.037602 1.769559  
44 6 0 -1.096243 3.124557 -0.386589  
45 1 0 -0.210894 2.689042 0.081074  
46 1 0 -1.093511 4.198489 -0.173515  
47 1 0 -1.017368 2.993490 -1.470347  
48 6 0 -2.472504 2.617387 1.677315  
49 1 0 -3.388776 2.149186 2.046295  
50 1 0 -2.469760 3.669202 1.982715  
51 1 0 -1.614407 2.128676 2.150754  
52 6 0 -3.600320 3.221491 -0.494707  
53 1 0 -3.584475 3.109840 -1.582991  
54 1 0 -3.567961 4.288472 -0.254594

55 1 0 -4.539740 2.807509 -0.121676

---

Compound 4BF<sub>2</sub>

Center Atomic Atomic Coordinates (Angstroms)

Number Number Type X Y Z

---

|    |   |   |           |           |           |
|----|---|---|-----------|-----------|-----------|
| 1  | 9 | 0 | 3.566865  | 1.065509  | 0.416203  |
| 2  | 9 | 0 | 3.565020  | -1.071792 | -0.419285 |
| 3  | 6 | 0 | -1.425362 | -1.225494 | -0.120448 |
| 4  | 6 | 0 | 0.758449  | -0.001524 | 0.000668  |
| 5  | 6 | 0 | -3.547712 | 0.001672  | 0.000380  |
| 6  | 1 | 0 | -4.635201 | 0.002650  | 0.000864  |
| 7  | 6 | 0 | -2.869616 | -1.214480 | -0.128094 |
| 8  | 7 | 0 | 1.596966  | -0.359099 | 0.984825  |
| 9  | 6 | 0 | -3.568859 | 2.455779  | 0.264061  |
| 10 | 1 | 0 | -4.655328 | 2.434166  | 0.269495  |
| 11 | 6 | 0 | -3.572550 | -2.452410 | -0.263734 |
| 12 | 1 | 0 | -4.658999 | -2.429308 | -0.268862 |
| 13 | 6 | 0 | 1.490035  | 0.342676  | -2.457633 |
| 14 | 6 | 0 | -0.730871 | -0.000414 | 0.000211  |
| 15 | 6 | 0 | -1.423490 | 1.225964  | 0.120738  |
| 16 | 6 | 0 | -0.756913 | 2.487573  | 0.243592  |
| 17 | 1 | 0 | 0.327023  | 2.514814  | 0.222277  |
| 18 | 6 | 0 | -2.898294 | -3.637013 | -0.384146 |
| 19 | 1 | 0 | -3.443425 | -4.570334 | -0.487312 |
| 20 | 6 | 0 | -1.474199 | -3.651337 | -0.372109 |
| 21 | 1 | 0 | -0.949225 | -4.597444 | -0.463949 |
| 22 | 6 | 0 | -1.468849 | 3.651794  | 0.371814  |
| 23 | 1 | 0 | -0.942404 | 4.597165  | 0.463091  |
| 24 | 7 | 0 | 1.597239  | 0.355193  | -0.984250 |
| 25 | 6 | 0 | -0.760611 | -2.488278 | -0.243604 |
| 26 | 1 | 0 | 0.323368  | -2.517074 | -0.222681 |
| 27 | 6 | 0 | -2.867618 | 1.216942  | 0.128510  |
| 28 | 6 | 0 | -2.892856 | 3.639538  | 0.384072  |
| 29 | 1 | 0 | -3.436615 | 4.573664  | 0.487163  |
| 30 | 5 | 0 | 2.810656  | -0.002413 | -0.001724 |
| 31 | 6 | 0 | 1.490495  | -0.342536 | 2.458298  |
| 32 | 6 | 0 | 1.512470  | -1.113374 | -2.970265 |
| 33 | 1 | 0 | 1.540337  | -1.131064 | -4.065146 |
| 34 | 1 | 0 | 2.393580  | -1.634771 | -2.588756 |
| 35 | 1 | 0 | 0.619767  | -1.657477 | -2.646774 |
| 36 | 6 | 0 | 2.737458  | 1.087754  | -2.968325 |
| 37 | 1 | 0 | 2.732081  | 1.126832  | -4.061857 |
| 38 | 1 | 0 | 2.762241  | 2.111403  | -2.583363 |
| 39 | 1 | 0 | 3.650576  | 0.579399  | -2.647094 |

40 6 0 0.225444 1.061998 -2.952794  
41 1 0 0.250828 1.124793 -4.045307  
42 1 0 -0.685967 0.529304 -2.672016  
43 1 0 0.166896 2.078805 -2.554616  
44 6 0 0.223963 -1.057126 2.955357  
45 1 0 -0.686232 -0.525065 2.669354  
46 1 0 0.165135 -2.076264 2.563402  
47 1 0 0.246904 -1.113111 4.048374  
48 6 0 2.735766 -1.090118 2.970474  
49 1 0 2.740799 -1.108395 4.064560  
50 1 0 2.746931 -2.121180 2.605004  
51 1 0 3.650444 -0.596697 2.631059  
52 6 0 1.517688 1.114625 2.967302  
53 1 0 0.622062 1.658076 2.650852  
54 1 0 1.555523 1.134813 4.061812  
55 1 0 2.395416 1.634984 2.576821

---

Compound 5BF<sub>2</sub>

Center Atomic Atomic Coordinates (Angstroms)  
Number Number Type X Y Z

---

1 9 0 -3.859926 0.152592 -1.444560  
2 9 0 -3.962646 0.055343 0.846475  
3 6 0 -1.109247 0.065246 -0.176169  
4 7 0 -1.956428 -0.971864 -0.287306  
5 6 0 -1.830359 2.449848 0.502486  
6 7 0 -1.932724 1.119985 -0.134510  
7 5 0 -3.157957 0.089745 -0.265932  
8 6 0 -1.818713 -2.270640 -0.982728  
9 6 0 -1.819128 2.293378 2.037301  
10 1 0 -1.844224 3.275446 2.521677  
11 1 0 -2.690518 1.720353 2.363893  
12 1 0 -0.915406 1.775012 2.372539  
13 6 0 -3.095651 3.213309 0.069727  
14 1 0 -3.091662 4.220750 0.496750  
15 1 0 -3.143960 3.296775 -1.019911  
16 1 0 -3.994928 2.695855 0.413804  
17 6 0 -0.584447 3.218407 0.032916  
18 1 0 -0.610495 4.234151 0.440529  
19 1 0 0.341515 2.747583 0.369291  
20 1 0 -0.559116 3.291364 -1.058728  
21 6 0 -0.661388 -3.103540 -0.408451  
22 1 0 0.309631 -2.637189 -0.590321  
23 1 0 -0.777784 -3.246473 0.669489  
24 1 0 -0.651113 -4.089537 -0.884232

25 6 0 -3.148179 -3.011013 -0.750869  
26 1 0 -3.120082 -3.994275 -1.230114  
27 1 0 -3.331740 -3.150482 0.318572  
28 1 0 -3.983073 -2.444743 -1.171510  
29 6 0 -1.613699 -2.034819 -2.493911  
30 1 0 -0.656304 -1.539801 -2.685999  
31 1 0 -1.612980 -2.988094 -3.033260  
32 1 0 -2.416792 -1.408705 -2.890093  
33 6 0 0.378251 0.048270 -0.134088  
34 6 0 1.069363 0.480085 -1.229743  
35 6 0 1.082097 -0.405796 1.047212  
36 6 0 2.499864 0.486146 -1.267893  
37 1 0 0.528228 0.831743 -2.103445  
38 6 0 2.510358 -0.396934 1.053296  
39 6 0 0.384391 -0.842425 2.199606  
40 6 0 3.184245 0.926206 -2.425141  
41 6 0 3.236691 0.049327 -0.129154  
42 6 0 3.170621 -0.828389 2.227895  
43 1 0 -0.700013 -0.860040 2.183969  
44 6 0 1.062841 -1.256112 3.328965  
45 6 0 4.563305 0.938666 -2.470741  
46 1 0 2.601773 1.255391 -3.281415  
47 6 0 4.648687 0.073446 -0.208862  
48 6 0 2.468449 -1.247883 3.341660  
49 1 0 4.253622 -0.831437 2.265507  
50 1 0 0.510593 -1.587288 4.202967  
51 6 0 5.297805 0.506970 -1.350436  
52 1 0 5.079670 1.278038 -3.363348  
53 1 0 5.245806 -0.253364 0.634437  
54 1 0 3.006171 -1.571761 4.227623  
55 1 0 6.383244 0.513220 -1.380808

-----  
Compound 6BF<sub>2</sub>

Center Atomic Atomic Coordinates (Angstroms)  
Number Number Type X Y Z

-----  
1 9 0 -4.663003 0.364764 0.263338  
2 9 0 -3.841836 0.021364 -1.852365  
3 6 0 -1.652995 -0.036259 0.236286  
4 7 0 -2.304763 1.072866 -0.153123  
5 6 0 -2.418717 -2.433560 -0.326078  
6 7 0 -2.554369 -1.002732 0.019188  
7 5 0 -3.554484 0.135188 -0.513778  
8 6 0 -2.247119 2.463398 0.350433  
9 6 0 -1.749081 -2.578089 -1.708308



10 1 0 -1.739630 -3.627999 -2.020296  
11 1 0 -2.297606 -1.997184 -2.454070  
12 1 0 -0.713676 -2.224506 -1.682987  
13 6 0 -3.856255 -2.981788 -0.387829  
14 1 0 -3.842341 -4.049349 -0.627170  
15 1 0 -4.363948 -2.846361 0.571678  
16 1 0 -4.433788 -2.462378 -1.156849  
17 6 0 -1.623321 -3.204644 0.740090  
18 1 0 -1.640858 -4.273653 0.504586  
19 1 0 -0.578692 -2.889340 0.782636  
20 1 0 -2.067111 -3.067941 1.731076  
21 6 0 -0.845973 3.074454 0.187034  
22 1 0 -0.105808 2.576931 0.817619  
23 1 0 -0.510016 3.014587 -0.852031  
24 1 0 -0.873940 4.130054 0.476080  
25 6 0 -3.254900 3.256382 -0.500666  
26 1 0 -3.269884 4.304797 -0.187761  
27 1 0 -2.984309 3.213591 -1.559880  
28 1 0 -4.261326 2.846069 -0.386472  
29 6 0 -2.676683 2.498201 1.832216  
30 1 0 -1.957186 1.961463 2.459348  
31 1 0 -2.729426 3.531489 2.191730  
32 1 0 -3.658900 2.034789 1.952666  
33 6 0 -0.277457 -0.158296 0.786530  
34 6 0 0.859494 0.011339 -0.038521  
35 6 0 -0.123303 -0.452455 2.147508  
36 6 0 2.157997 -0.123854 0.545380  
37 6 0 0.767017 0.300559 -1.445721  
38 6 0 1.138651 -0.568441 2.717392  
39 1 0 -1.008534 -0.588379 2.760596  
40 6 0 3.325071 0.030252 -0.263041  
41 6 0 2.295471 -0.411156 1.938246  
42 6 0 1.883207 0.442020 -2.212599  
43 1 0 -0.215220 0.415958 -1.890758  
44 1 0 1.235960 -0.787939 3.776714  
45 6 0 3.200278 0.314092 -1.656169  
46 6 0 4.623081 -0.099372 0.318864  
47 6 0 3.613882 -0.533926 2.495878  
48 1 0 1.789649 0.660114 -3.272980  
49 6 0 4.361350 0.460243 -2.432003  
50 6 0 5.755486 0.056057 -0.496482  
51 6 0 4.724283 -0.385159 1.723251  
52 1 0 3.705708 -0.751276 3.556442  
53 6 0 5.623492 0.332279 -1.855966  
54 1 0 4.264825 0.676186 -3.492446  
55 1 0 6.742819 -0.042093 -0.053566

56 1 0 5.714506 -0.482146 2.160154  
57 1 0 6.510900 0.448831 -2.470735

---
